# Supplementary material for: Cotton cytochrome P450 CYP82D regulates systemic cell death by modulating the octadecanoid pathway
Source: PubMed Central journal article supplement (PMC4241986; doi:10.1038/ncomms6372), 2014-11-05
Supplement: ncomms6372-s1.pdf [file ncomms6372-s1.pdf]

```

GhCYP82D1 1 MDPLDLSFGYAVVLGITLLFLYTKLKKSSSGSSKAAPVAAGAWPIIGHLPLLGGPK-TPHEALGDLGKGYPAYMIRIGVHPALVVNS
GhCYP82D2 1 MDPLDLSFGYAVVLGITLLFLYTKLKKSSSGSSGKAPVAAGAWPIIGHLPLLGGPK-APHEALGDLGKGYPAYMIRIGVHPALVVNS
GhCYP82D3 1 MDPLDLSFGYAVVLGITLLFLYTKLKKSSSGSSGKAPVAAGAWPIIGHLPLLGGPK-APHEALGDLGKGYPAYMIRIGVHPALVVNS
PtCYP82D2 1 MDLLP--YLSTIIFTAIVLSTCYLLKSSSGSSSKTMAPASGAWPIIGHLPLLGCAE-LPHLALCALAKGYPIFTIRIGVHPALVVSS
AtCYP82C2 1 MDTSLSFG-----LFPVILVIVVIALEPKRKKPKVKAKAPSGAWPIIGHLHLLSGKEQLLYRLLGKMDADQCYPAASLRGCSSETFVVS

GhCYP82D1 90 SEVAKEIFTVNDMIVSSRSEFAAAEHLGYNAMFGFSPYGOVWRMRKITMLEVLSNHRIDQLKKVFSSEIEGSMKLLYKTWAAK-RDGS
GhCYP82D2 90 SEVAKEIFTVNDMIVSSRSEFAAAEHLGYNAMFGFSPYGOVWRMRKITMLEVLSNHRIDQLKKVFSSEIEGSMKLLYKTWAAK-RDGS
GhCYP82D3 90 SEVAKEIFTVNDMIVSSRSEFAAAEHLGYNAMFGFSPYGOVWRMRKITMLEVLSNHRIDQLKKVFSSEIEGSMKLLYKTWAAK-RDGS
PtCYP82D2 87 WDAKKEIFTVNDALVSSRPKLTAASKLGYNFAFGFSPYGEVFRGTRKIVASELNSNRRLDQLKRVFASVVEVSEVLELYKLVYSKDKNEE
AtCYP82C2 85 FEVAKDCFTVNDKABSRPIATAAKHMGYPCAVFGFAPYSAPWRMRKIATLEKLSNRRLQMLKRVVRSISIMVMDLYSLVVKK--GFS

GhCYP82D1 179 SKVLVEMKKHFSDLTLNVIMRTVAGKRYSD--VVAEDQKIVLRIRKALRDFHLLTGMFVLGDAVPPFLRWLDGGYEKRMKRTAKELDEI
GhCYP82D2 179 SKVLVEMKKHFSDLTLNVIMRTVAGKRYSD--VVAEDQKIVLRIRKALRDFHLLTGMFVLGDAVPPFLRWLDGGYEKRMKRTAKELDEI
GhCYP82D3 179 SKVLVEMKKHFSDLTLNVIMRTVAGKRYSD--VVAEDQKIVLRIRKALRDFHLLTGMFVLGDAVPPFLRWLDGGYEKRMKRTAKELDEI
PtCYP82D2 177 SKVLVEMKKHFSDLTLNVIMRTVAGKRYSD--AGIVTEENERRRQRAVRDFHLLTGMFVLGDAVPPFLRWLDGGYEKRMKRTAKELDEI
AtCYP82C2 173 EIVVMDLRSWLEDMSLNMVVMVAGKRYFGGGSLSPEDAEVARQCRKGVANFFHLVGHFFVSDAPFRLGDFDQGEKEMKRTAKELDEI

GhCYP82D1 266 SGGWLDDHR-KGGRW DENKKEKDFMDVMNSVLKASLAGYDADTTIN--KATSLNMIAGSDTTTIVTLINGLSLMLNKPHELKKAEELDT
GhCYP82D2 266 SGGWLDDHR-KGGRW DENKKEKDFMDVMNSVLKASLAGYDADTTIN--KATSLNMIAGSDTTTIVTLINGLSLMLNKPHELKKAEELDT
GhCYP82D3 266 SGGWLDDHR-KGGRW DENKKEKDFMDVMNSVLKASLAGYDADTTIN--KATSLNMIAGSDTTTIVTLINGLSLMLNKPHELKKAEELDT
PtCYP82D2 265 FDEWLAEHRRIRDSGESANKKQDFMDVMLYALDCHNLAGYDADTVR--KATSLSHIIGGSDTTIVTLINGLSLMLNKPHELKKAEELDV
AtCYP82C2 263 LERWEEENHRQQRKVSGETKHNDSDFVDVMDLAEQGFSLQHDATTSIKSGLALIDGGSETSPSTDTWALSLLLNKNDMLKKAQDELDI

GhCYP82D1 353 HIGRDRFVNETDIGKLVYIQAIVKETLRMYPAPLSAPRELSESCSIGGYDIPKGTRLINLHKIQRDPKKWEPESEFKPERFLT-THKD
GhCYP82D2 353 HIGRDRFVNETDIGKLVYIQAIVKETLRMYPAPLSAPRELSESCSIGGYDIPKGTRLINLHKIQRDPKKWEPESEFKPERFLT-THKD
GhCYP82D3 353 HIGRDRFVNETDIGKLVYIQAIVKETLRMYPAPLSAPRELSESCSIGGYDIPKGTRLINLHKIQRDPKKWEPESEFKPERFLT-THKD
PtCYP82D2 353 HIGRDRFVNETDIGKLVYIQAIVKETLRMYPAPLSAPRELSESCSIGGYDIPKGTRLINLHKIQRDPKKWEPESEFKPERFLT-SHKA
AtCYP82C2 353 HIGRDRFVNETDIGKLVYIQAIVKETLRMYPAPLSAPRELSESCSIGGYDIPKGTRLINLHKIQRDPKKWEPESEFKPERFLT-GEAKE

GhCYP82D1 442 VDVRGQHFELMPFGSGRRSCPCTSFALHMLVLTMSNFLHAFDFSTPSNGLIDLGTAGLTNIKSTPLEALVSPRLAPELYN---
GhCYP82D2 442 VDVRGQHFELMPFGSGRRSCPCTSFALHMLVLTMSNFLHAFDFSTPSNGLIDLGTAGLTNIKSTPLEALVSPRLAPELYN---
GhCYP82D3 442 VDVRGQHFELMPFGSGRRSCPCTSFALHMLVLTMSNFLHAFDFSTPSNGLIDLGTAGLTNIKSTPLEALVSPRLAPELYN---
PtCYP82D2 442 VDVRGQHFELMPFGSGRRSCPCTSFALHMLVLTMSNFLHAFDFSTPSNGLIDLGTAGLTNIKSTPLEALVSPRLAPELYN---
AtCYP82C2 443 VDVRGQHFELMPFGSGRRSCPCTSFALHMLVLTMSNFLHAFDFSTPSNGLIDLGTAGLTNIKSTPLEALVSPRLAPELYN---

```

**Supplementary Fig. 1.** Comparison of amino acid sequences for GhCYP82D1 (SSN1), GhCYP82D2 (SSN2), and GhCYP82D3 (SSN3) with PtCYP82D2 and AtCYP82C2. The helix K domain is marked by the purple box; the helix I domain, by the blue box; and the heme-binding domain, by the red box.

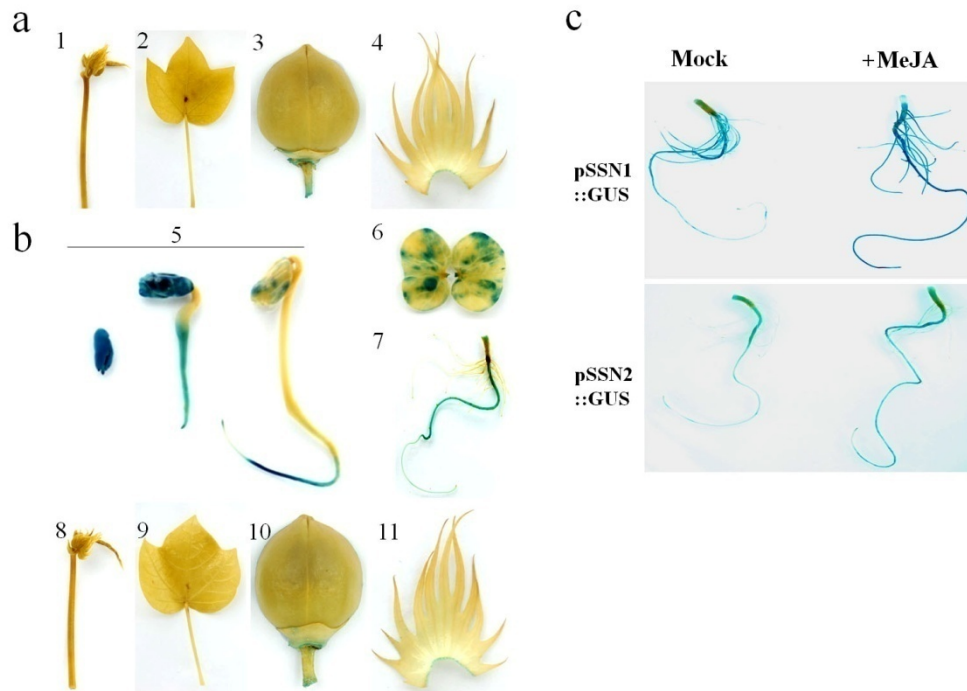

**Supplementary Fig. 2.** GUS detection. (a) SSN1 promoter::GUS fusion expression patterns in transgenic cotton. GUS staining was undetectable in the branch (1), mature leaf (2), cotton boll (3) and bract (4). (b) SSN2 promoter::GUS fusion expression patterns in transgenic cotton. GUS staining was shown in the germinating seeds (5), cotyledon (6) and root (7) of young seedlings but was undetectable in the branch (8), mature leaf (9), cotton boll (10) and bract (11). (c) MeJA-induced pSSN1::GUS and pSSN2::GUS expression in the root. pSSN1::GUS and pSSN2::GUS seedlings (9-day-old) were exposed to 100  $\mu$ M MeJA for 2 hours and stained overnight.

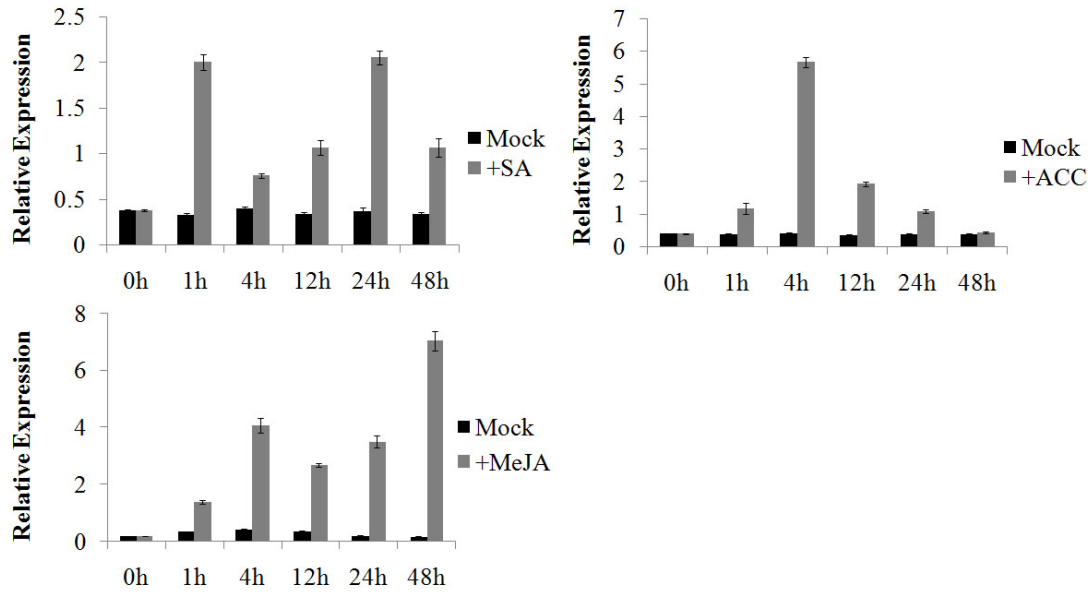

**Supplementary Fig. 3.** *SSN* responses to phytohormone MeJA, SA and ACC treatments in WT cotton YZ1. The plants were pre-treated with Hoagland's; MeJA, ACC and SA were then added to the solution to the final concentrations of 50  $\mu$ M, 5  $\mu$ M and 0.5 mM, respectively. qRT-PCR was performed at 0, 1, 4, 12, 24 and 48 h after treatment. Error bars indicate SD from four technical replicates. Gene expression levels were normalised to *UBQ7*.





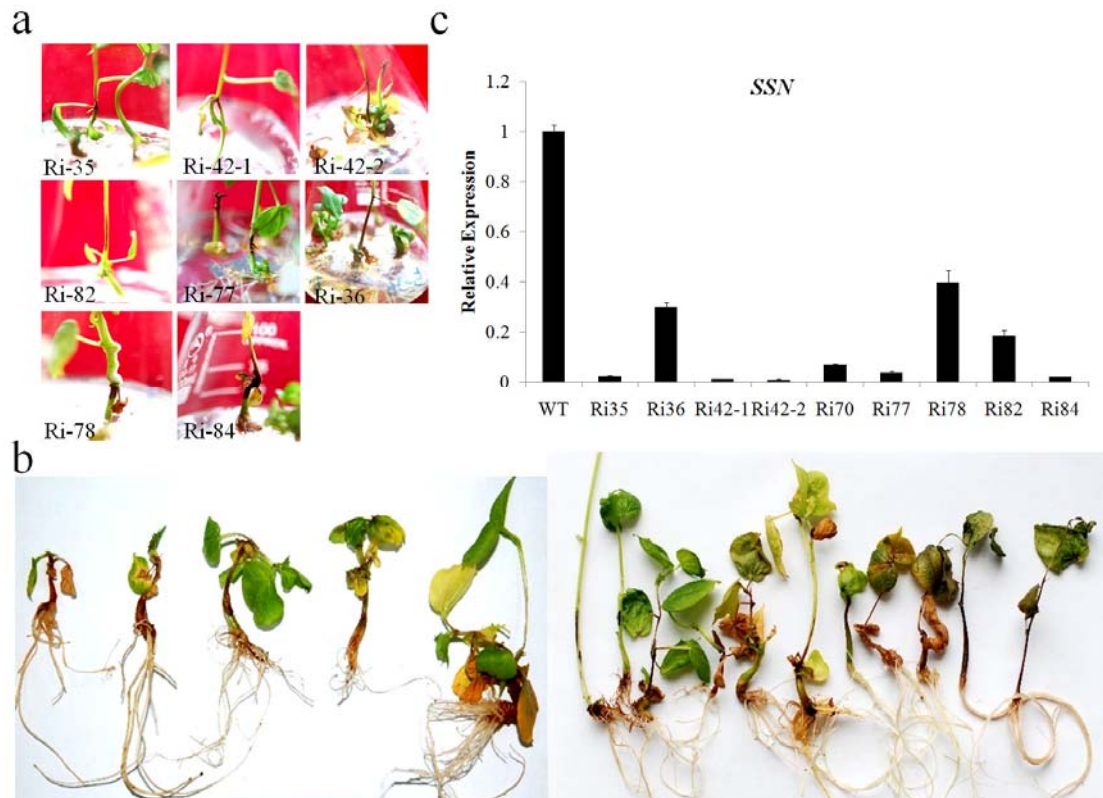

**Supplementary Fig. 5.** The *SSN*-RNAi T0 seedling lesion phenotype and *SSN* expression level for the transgenic plants analysed using qRT-PCR. **(a)** The lesion phenotype appeared on regenerated seedling stems. **(b)** A large number of transgenic plants died in plant regeneration medium before being transplanted to the soil. **(c)** The qRT-PCR analysis showed that *SSN* expression was downregulated in transgenic seedlings. Error bars indicate SD from four technical replicates. The gene expression levels were normalised to *UBQ7*.

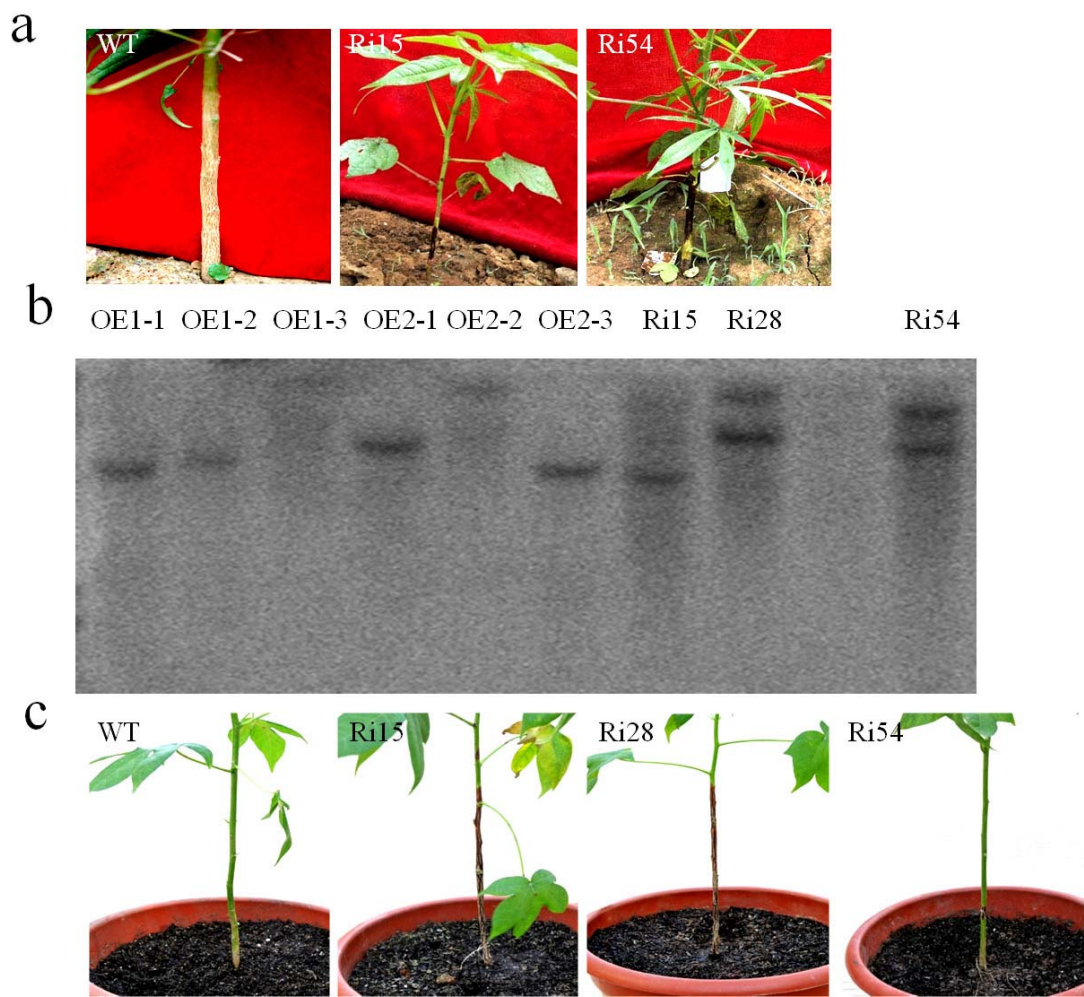

**Supplementary Fig. 6.** Phenotypic observations and Southern blot analysis. **(a)** The lesion phenotype of *SSN*-RNAi T0 lines in the field. **(b)** Southern blot analysis for transgenic plants. The probe was *NPTII*. The plants were treated as separate transgenic events in the following analysis. **(c)** The lesion phenotype of *SSN*-RNAi offspring cultured in the green house.



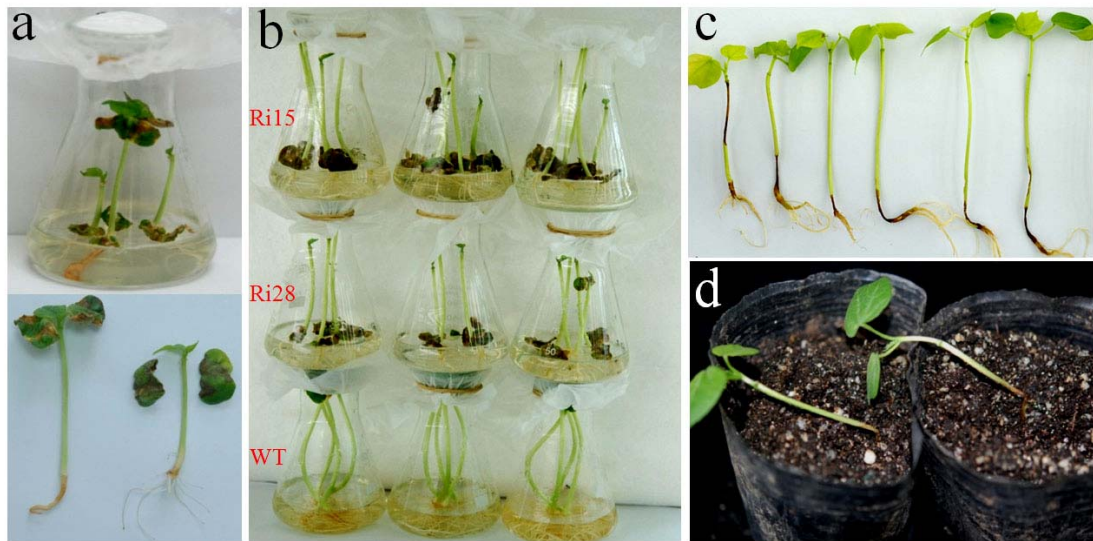

**Supplementary Fig. 7.** The lesion phenotype of *SSN*-RNAi offspring. **(a)** Cotyledons from the Ri15 T1 line showed a lesion phenotype and abscised earlier on media containing kanamycin (plants that develop roots are transformants on this medium). **(b)** Cotyledons from the T3 lines showed a lesion phenotype and abscised earlier on the media. **(c, d)** The transgenic offspring stems showed a lesion phenotype approximately two or three weeks not only under Hoagland's solution conditions but also under small-pot soil culture conditions.

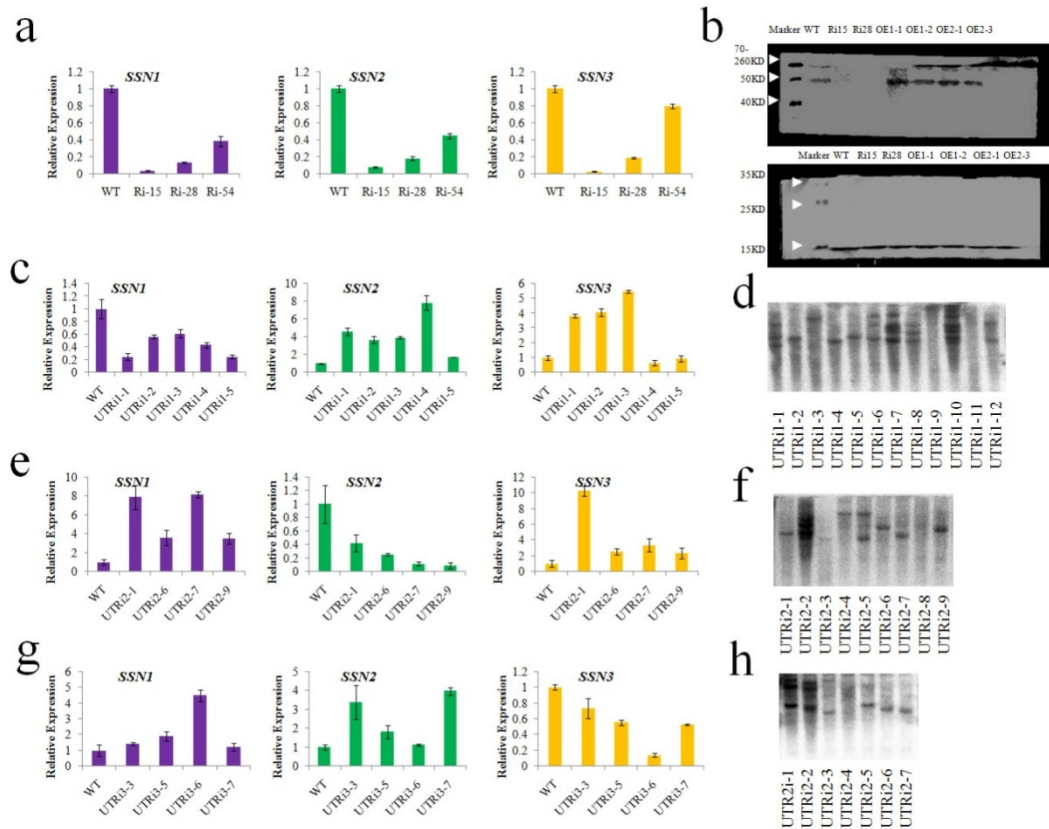

**Supplementary Fig. 8.** 3'-UTR specific silencing analysis of the *SSN* gene family. **(a)** qRT-PCR analysis of *SSN1*, *SSN2* and *SSN3* expression in *SSN* conserved-region silenced lines. The *SSN1*, *SSN2* and *SSN3* expression levels in each line were calculated relative to the WT plants. The RNA was extracted from roots of 6-day-old homozygous seedlings grown on medium. **(b)** Western blotting revealed different expression levels among the transgenic and WT plants leaves. Antibodies were prepared using the same *SSN1* and *SSN2* protein amino acid sequences as the probes; anti-histone was used as a control. Ri: *SSN*-RNAi plants; OE1: *SSN1*-overexpression plants; OE2: *SSN2*-overexpression plants. **(c, d)** qRT-PCR analysis of *SSN1*, *SSN2* and *SSN3* expression in UTRi1 (*SSN1*) silenced lines. For the Southern blot analysis, the transgenic plants were probed by *NPTII*. **(e, f)** qRT-PCR analysis of *SSN1*, *SSN2* and *SSN3* expression in UTRi2 (*SSN2*) silenced lines. For the Southern blot analysis, the



transgenic plants were probed by *NPTII*. (g, h) qRT-PCR analysis of *SSN1*, *SSN2* and *SSN3* expression in UTRi3 (*SSN3*) silenced lines. For the Southern blot analysis, the transgenic plants were probed by *NPTII*. Error bars indicate SD from four technical replicates. The gene expression levels were normalised to *UBQ7*.

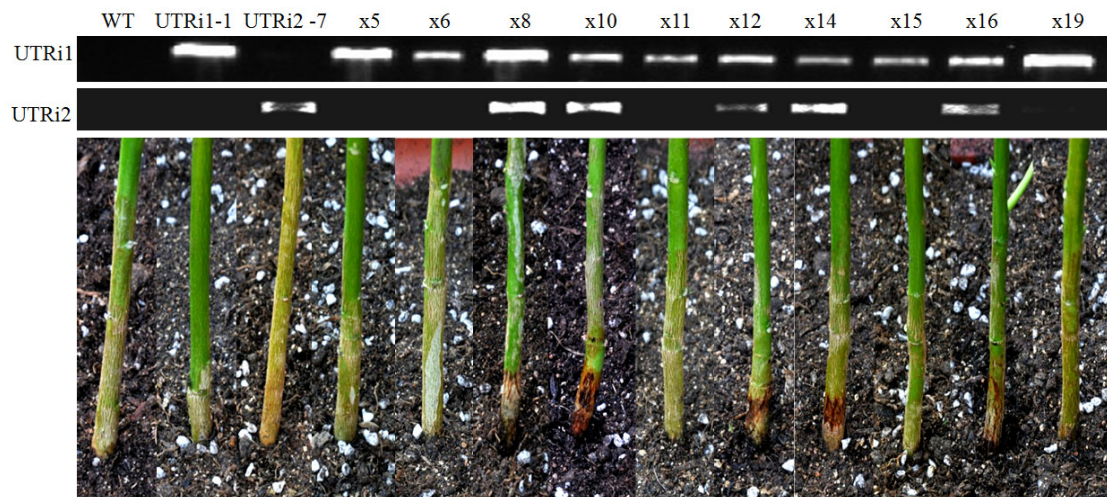

**Supplementary Fig. 9.** F1 plants from crossing a homozygous UTRi1 (*SSN1*) silenced plant with a heterozygous UTRi2 (*SSN2*) silenced plant; one gene-specific primer (from the 3'-UTR of *SSN1* or 3'-UTR of *SSN2*) and one vector primer (from a 35S promoter) were used to amplify and examine the transgene segment in F1 plants. Plants with both amplifications showed the lesion mimic phenotype, but plants with only one amplification did not show a lesion phenotype.

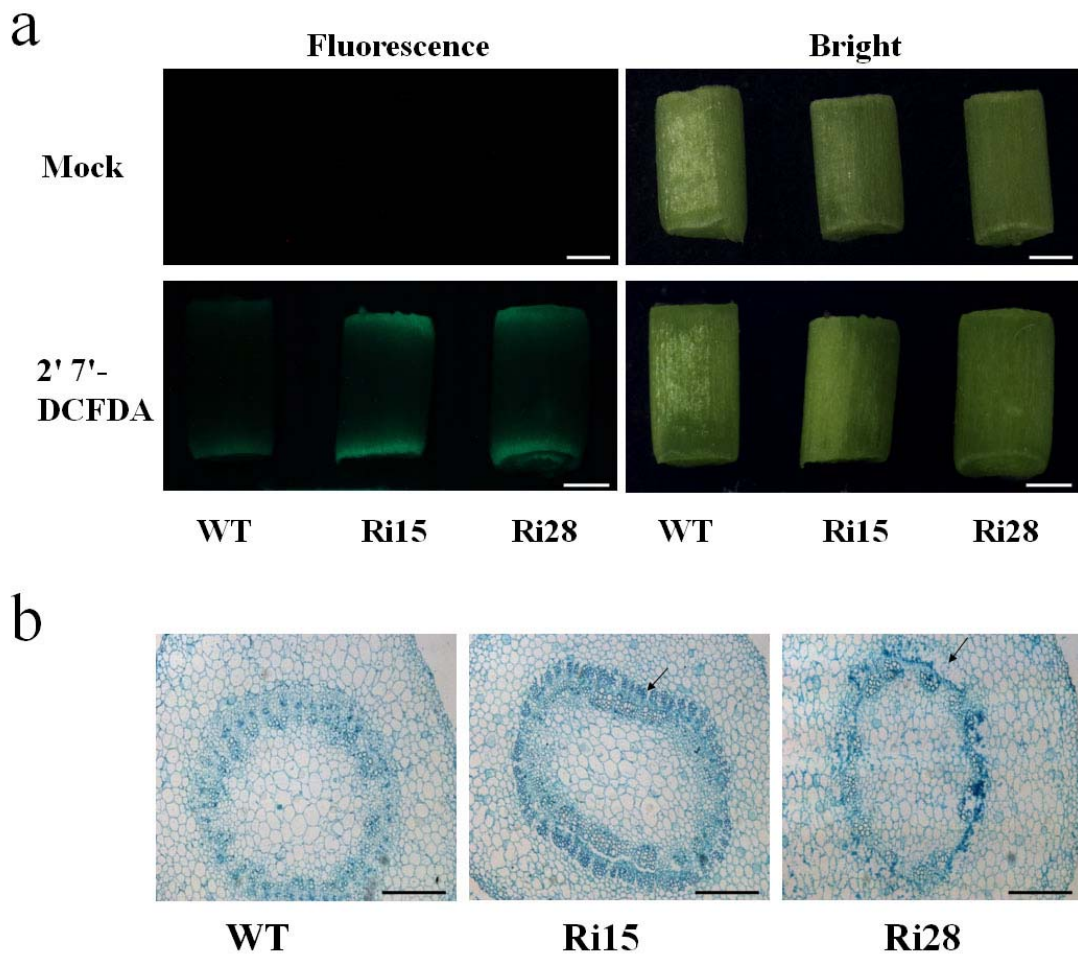

**Supplementary Fig. 10.** ROS detection by 2',7'-DCFDA staining in transverse section of hypocotyl segments of 9 day-old seedlings. (a) Fluorescence and bright field image of ROS in stems of *SSN*-RNAi and wild-type lines by 2',7'-DCFDA staining. Bars = 1 mm. (b) Transverse section of the 9 day-old stem segments. Bar = 40  $\mu$ m. The cells of vascular bundles in *SSN*-RNAi showed necrosis and were collapsed.

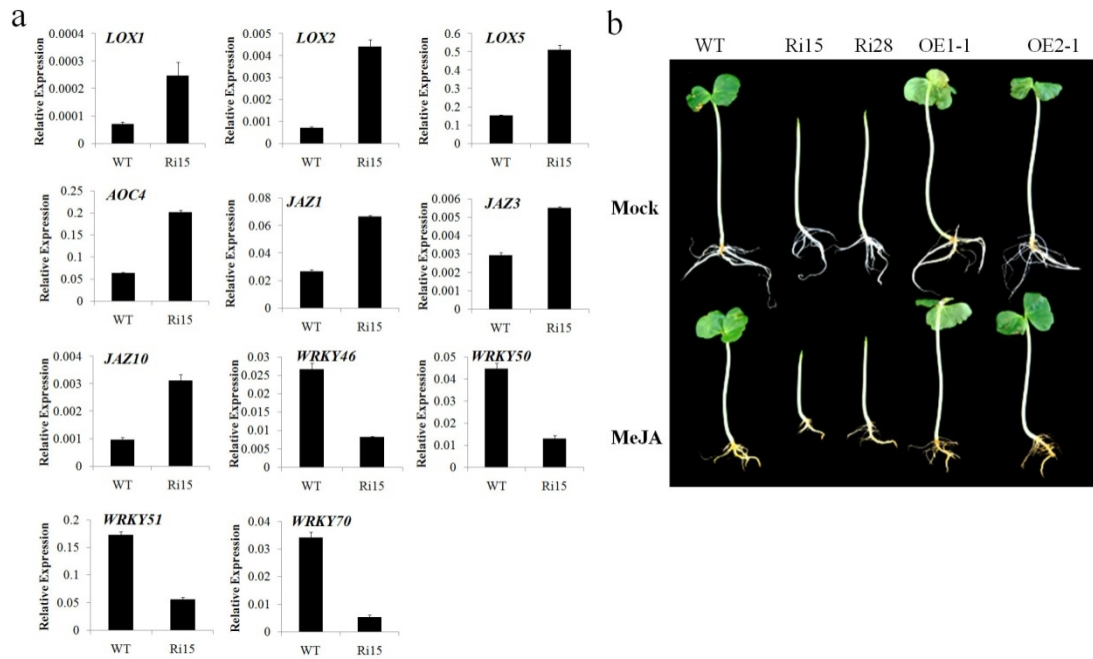

**Supplementary Fig. 11.** Verification of the RNA-Seq data in *SSN*-RNAi plants. **(a)** Selected genes based on the JA synthesis and signal transduction pathways from the RNA-Seq data were verified using qRT-PCR. RNA was extracted from 6 day-old seedling roots. The values are the means  $\pm$  SD for three biological replicates. **(b)** The morphological phenotype of WT and overexpression seedlings showed no difference in sensitivity in JA-induced growth inhibition when grown for 7 days on media containing MeJA (1  $\mu$ M). The *SSN*-RNAi seedling cotyledons had already lost cotyledons.

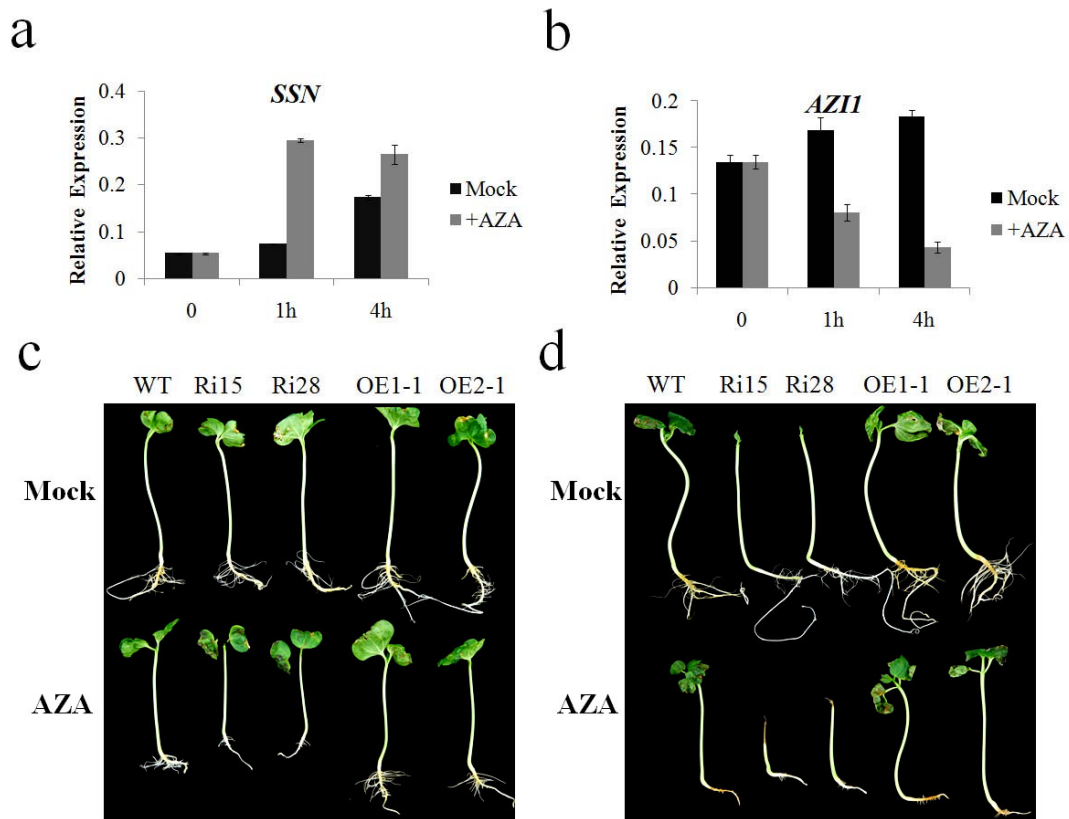

**Supplementary Fig. 12.** Gene expression and phenotype changes in cotton seedlings in response to the AZA treatments. **(a)** *SSN* responses to the AZA treatments in WT plants. RNA was extracted from 3 week-old seedling roots at different intervals after AZA (1mM) application. **(b)** Expression of the AZA-inducible gene *AZII* in WT plants after the AZA application. Data **(a, b)** are presented as the means  $\pm$  SD collected from four technical replicates. **(c)** Morphological phenotypes for WT and transgenic lines treated with AZA (0.2 mM) in the medium. 1.5 day-old plants were subjected to different treatments and photographed 5 days after treatment. Many AZA-treated *SSN*-RNAi plants showed typical lesion mimic symptoms on the cotyledons. **(d)** Plants treated with AZA (0.5 mM) in the medium. 1.5 day-old plants were subjected to different treatments and photographed 10 days after treatment. High concentrations of AZA treatment enhanced the stem lesion mimic phenotype.



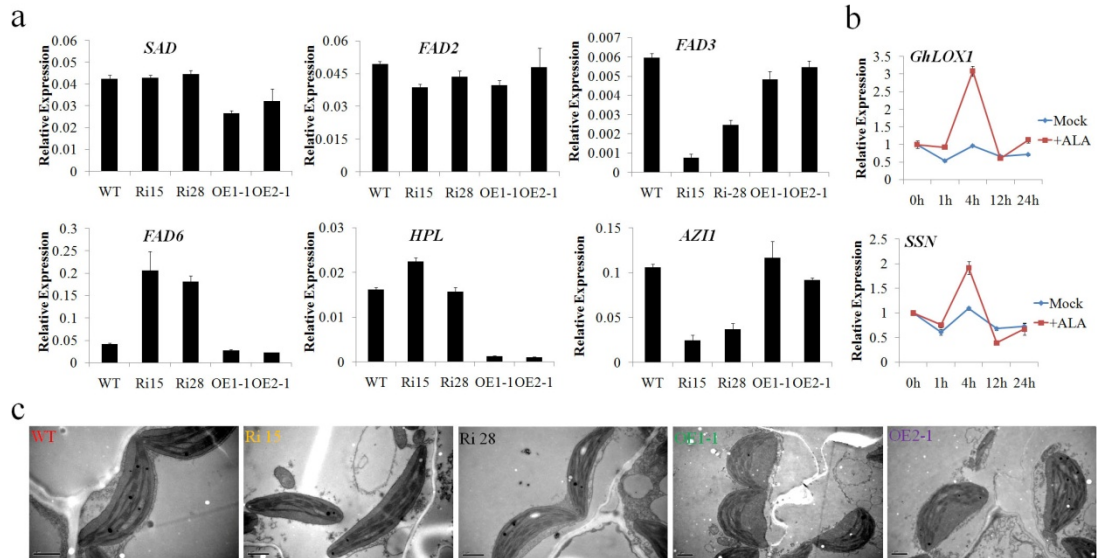

**Supplementary Fig. 13.** SSN modulates fatty acids metabolism. **(a)** Key genes selected from the octadecanoid pathway showed significantly different expression levels in *SSN*-RNAi and OE lines. *SAD*, stearyl-acyl carrier protein desaturase; *FAD2*,  $\omega$ -6 fatty-acid desaturase; *FAD3*,  $\omega$ -3 fatty-acid desaturase; *FAD6*,  $\omega$ -6 fatty acid desaturase; *HPL*, hydro-peroxide lyase; and *AZI1*, azelaic acid induced 1. RNA was extracted from roots of 6-day-old seedlings. **(b)** The expression pattern analysis for *SSN* in response to the linolenic acid (ALA) treatments in cotton cotyledons using qRT-PCR. RNA was extracted from seedlings at different intervals after an ALA (10 mM) application. *GhLOX1* and *SSN* were significantly upregulated in the cotyledon following ALA treatment. Data **(a, b)** are presented as the means  $\pm$  SD collected from four technical replicates. **(c)** TEM micrographs of cotyledon cells from WT and transgenic plants showing that chloroplast development was retarded in the overexpression lines. Scale bars = 1  $\mu$ m.

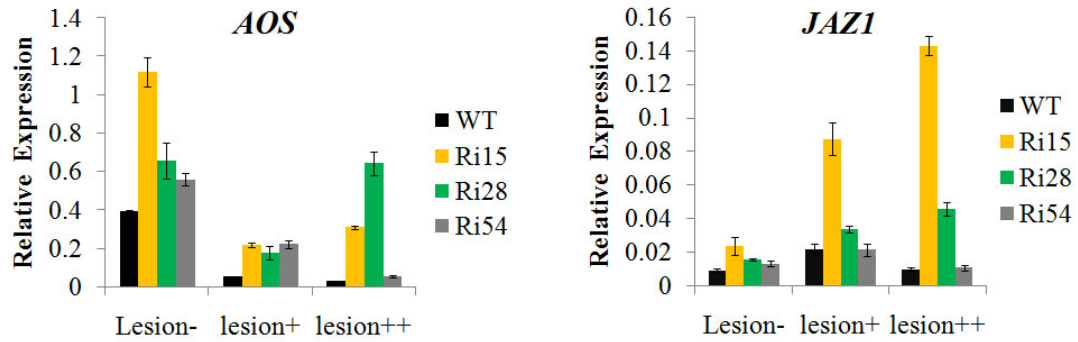

**Supplementary Fig. 14.** *AOS* and *JAZ1* transcript levels at the different lesion formation stages shown in **Fig. 6a**. Genes involved in jasmonate biosynthesis were constitutively activated. Total RNA was extracted from cotyledons as shown in **Fig. 6a** and subjected to qRT-PCR analyses. The values are the means  $\pm$  SD of three biological replicates. Gene expression levels were normalised to *UBQ7*.

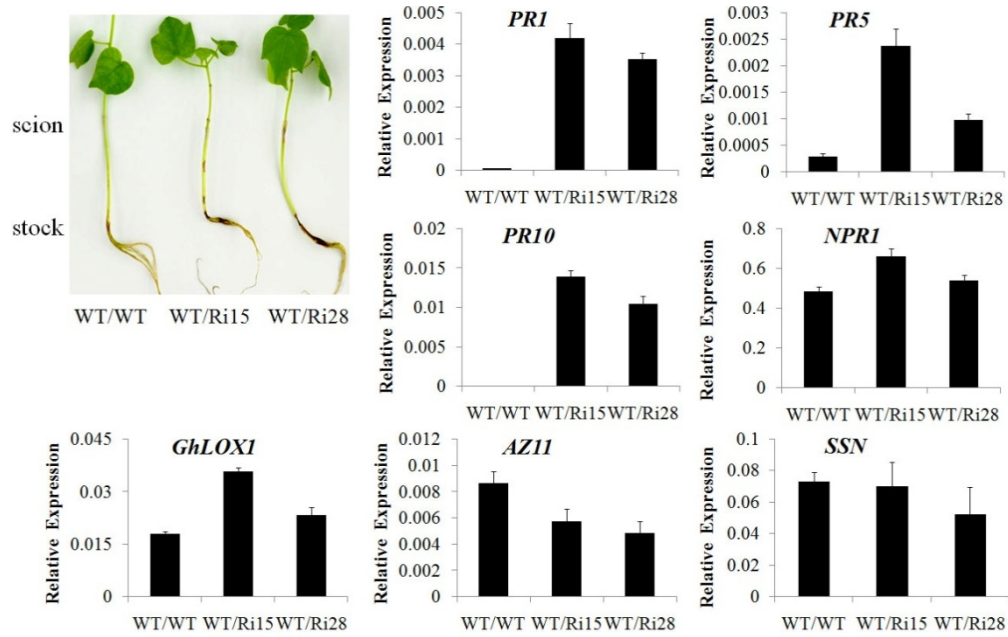

**Supplementary Fig. 15.** Grafting studies and gene expression in grafted scion leaves.

The SAR marker genes were constitutively activated. WT/WT, WT/Ri15 and WT/Ri28 indicate WT scions grafted onto wild-type or *SSN*-RNAi rootstocks. Total RNA was extracted from leaves of 3 week-old plants after grafting and subjected to qRT-PCR analyses. The values are the means  $\pm$  SD for three biological replicates. Transcript levels of each gene were normalised to *UBQ7*.

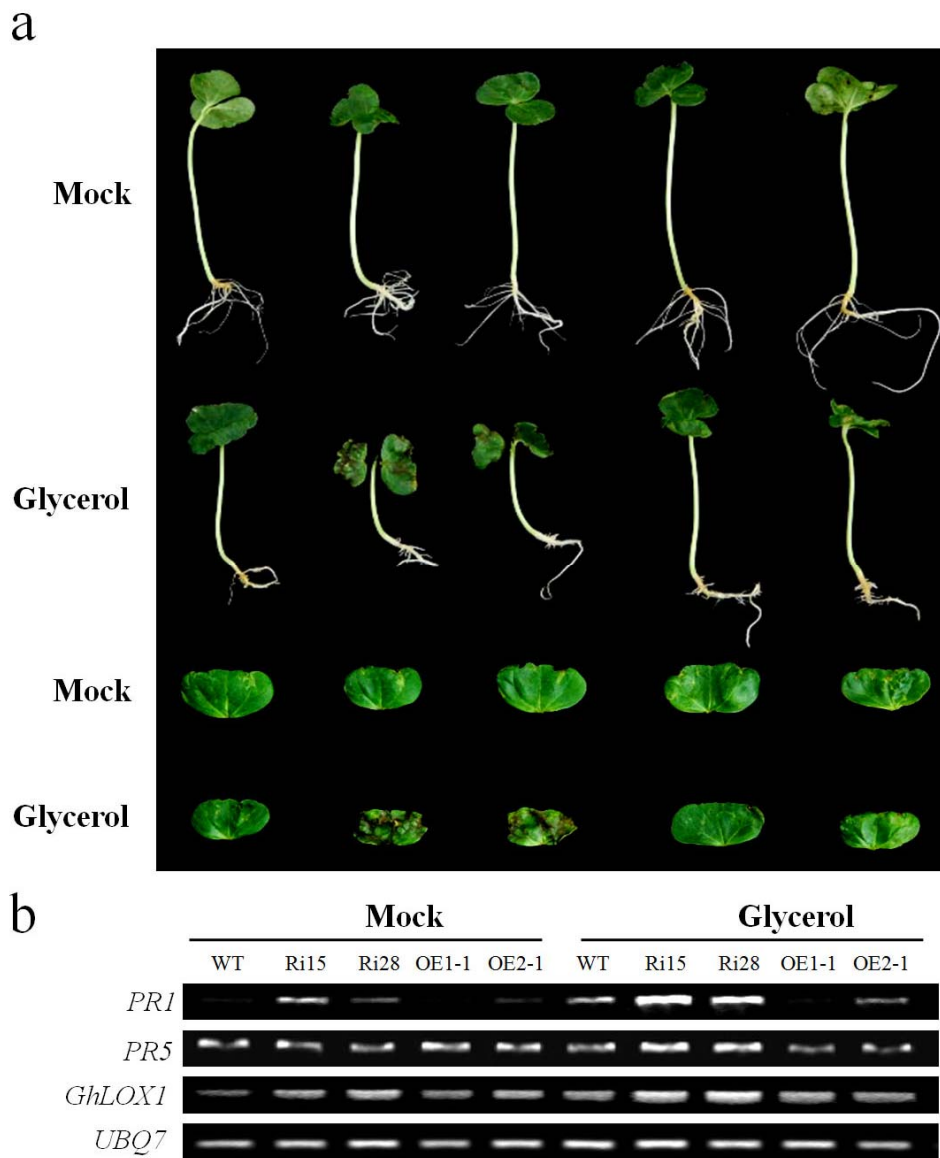

**Supplementary Fig. 16.** Morphological phenotype of the WT and transgenic seedlings treated by glycerol on the media. **(a)** Silenced plants showed more sensitivity to glycerol-mediated growth inhibition and exhibited accelerated and aggravated HR-like necrosis for the seedlings grown for 5 days on media containing glycerol (0.5%). **(b)** RT-PCR analysis of the marker genes associated with HR in transgenic seedling cotyledons grown for 3 days on glycerol (0.5%) media. The expression levels of the three marker genes were all stronger in *SSN*-RNAi plants. The cotton *UBQ7* gene was amplified as a control.



**Supplementary Table 1** Genes differentially expressed between WT and Ri15in roots as determined using RNA-Seq.

| GeneID             | log2<br>Ratio (WT/ <i>SSN</i> -RNAi) | P-value  | FDR      | Description (WT/ <i>SSN</i> -RNAi)                                                                                                          |
|--------------------|--------------------------------------|----------|----------|---------------------------------------------------------------------------------------------------------------------------------------------|
| zhu1_Ghi#S28697621 | 3.316571447                          | 3.18E-06 | 6.04E-05 | AT1G26770.2   Symbols: ATEXPA10, AT-EXP10, ATEXP10, ATHEXP ALPHA 1.1, EXP10, EXPA10   expansin A10   chr1:9259775-9260792 FORWARDLENGTH=259 |
| zhu1_Ghi#S33808000 | 2.38963491                           | 1.60E-07 | 3.86E-06 | AT1G49820.1   Symbols: ATMTK, MTK   S-methyl-5-thioribose kinase  chr1:18443005-18444907 FORWARD LENGTH=420                                 |
| zhu1_Ghi#S28658229 | 2.088465375                          | 0        | 0        | AT5G42650.1   Symbols: AOS, CYP74A, DDE2   allene oxide synthase  chr5:17097803-17099359 REVERSE LENGTH=518                                 |
| zhu1_Ghi#S42301433 | 1.980362433                          | 1.27E-13 | 8.05E-12 | AT5G42650.1   Symbols: AOS, CYP74A, DDE2   allene oxide synthase  chr5:17097803-17099359 REVERSE LENGTH=518                                 |
| zhu1_Ghi#S28674097 | 1.97459741                           | 0        | 0        | AT3G11340.1   Symbols:   UDP-Glycosyltransferase superfamily protein  chr3:3556728-3558149 FORWARD LENGTH=447                               |
| zhu1_Ghi#S30014770 | 1.866600158                          | 5.57E-08 | 1.46E-06 | AT3G45140.1   Symbols: LOX2, ATLOX2   lipoxygenase 2   chr3:16525437-16529233FORWARD LENGTH=896                                             |
| zhu1_Ghi#S33838870 | 1.778385717                          | 1.21E-10 | 4.33E-09 | AT5G22580.1   Symbols:   Stress responsive A/B Barrel Domain  chr5:7502709-7503137 FORWARD LENGTH=111                                       |
| zhu1_Ghi#S42283807 | 1.754471596                          | 0        | 0        | AT1G05010.1   Symbols: EFE, ACO4, EAT1   ethylene-forming enzyme  chr1:1431419-1432695 REVERSE LENGTH=323                                   |
| zhu1_Ghi#S42295371 | 1.699641979                          | 3.73E-13 | 2.25E-11 | AT1G55020.1   Symbols: LOX1, ATLOX1   lipoxygenase 1   chr1:20525798-20530143FORWARD LENGTH=859                                             |
| zhu1_Ghi#S42326912 | 1.691880639                          | 1.70E-12 | 8.82E-11 | AT5G13220.1   Symbols: JAZ10, TIFY9, JAS1   jasmonate-zim-domain protein 10  chr5:4219001-4220502 FORWARD LENGTH=197                        |
| zhu1_Ghi#S42308858 | 1.682416659                          | 0        | 0        | AT1G13280.1   Symbols: AOC4   allene oxide cyclase 4   chr1:4547624-4548552FORWARD LENGTH=254                                               |

|                    |             |          |          |                                                                                                                                                  |
|--------------------|-------------|----------|----------|--------------------------------------------------------------------------------------------------------------------------------------------------|
| zhu1_Ghi#S33825599 | 1.679141527 | 0        | 0        | NoHits                                                                                                                                           |
| zhu1_Ghi#S42301072 | 1.660135446 | 0        | 0        | AT2G02990.1   Symbols: RNS1, ATRNS1   ribonuclease 1  <br>chr2:873714-874667FORWARD LENGTH=230                                                   |
| zhu1_Ghi#S28640612 | 1.656082511 | 1.98E-12 | 1.02E-10 | NoHits                                                                                                                                           |
| zhu1_Ghi#S42305390 | 1.64787253  | 6.75E-14 | 4.38E-12 | AT1G68560.1   Symbols: ATXYL1, XYL1, TRG1   alpha-xylosidase 1<br> chr1:25734435-25737897 REVERSE LENGTH=915                                     |
| zhu1_Ghi#S33832915 | 1.631926888 | 2.61E-07 | 6.08E-06 | AT3G61460.1   Symbols: BRH1   brassinosteroid-responsive RING-H2<br> chr3:22741701-22742213 REVERSE LENGTH=170                                   |
| zhu1_Ghi#S30013426 | 1.626526901 | 1.71E-09 | 5.35E-08 | AT1G09815.1   Symbols: POLD4   polymerase delta 4  <br>chr1:3189460-3190050FORWARD LENGTH=124                                                    |
| zhu1_Ghi#S42321096 | 1.590243723 | 7.54E-13 | 4.21E-11 | NoHits                                                                                                                                           |
| zhu1_Ghi#S42300243 | 1.555443803 | 4.59E-07 | 1.03E-05 | AT3G12110.1   Symbols: ACT11   actin-11   chr3:3858116-3859609<br>FORWARDLENGTH=377                                                              |
| zhu1_Ghi#S42334867 | 1.5133129   | 3.61E-12 | 1.71E-10 | AT3G22400.1   Symbols: LOX5   PLAT/LH2 domain-containing lipoxygenase<br>familyprotein   chr3:7927011-7931167 FORWARD LENGTH=886                 |
| zhu1_Ghi#S42360391 | 1.490465351 | 7.11E-08 | 1.83E-06 | AT1G19180.1   Symbols: JAZ1, TIFY10A   jasmonate-zim-domain protein 1<br> chr1:6622312-6623271 FORWARD LENGTH=253                                |
| zhu1_Ghi#S28663402 | 1.477726239 | 3.78E-07 | 8.57E-06 | NoHits                                                                                                                                           |
| zhu1_Ghi#S29997408 | 1.477359654 | 8.88E-13 | 4.84E-11 | NoHits                                                                                                                                           |
| zhu1_Ghi#S42360575 | 1.467637422 | 0        | 0        | AT4G15560.1   Symbols: CLA1, DEF, CLA, DXS, DXPS2  <br>Deoxyxylulose-5-phosphatesynthase   chr4:8884218-8887254 FORWARD<br>LENGTH=717            |
| zhu1_Ghi#S33809128 | 1.424657195 | 0        | 0        | AT1G78550.1   Symbols:   2-oxoglutarate (2OG) and Fe(II)-dependent<br>oxygenasesuperfamily protein   chr1:29545031-29546360<br>REVERSELENGTH=356 |
| zhu1_Ghi#S42305326 | 1.414990484 | 1.61E-09 | 5.06E-08 | AT5G12010.1   Symbols:   unknown protein; INVOLVED IN: response to salt                                                                          |

|                    |             |          |          |                                                                                                                                                                                                                                                                                                                                                                                                                                          |
|--------------------|-------------|----------|----------|------------------------------------------------------------------------------------------------------------------------------------------------------------------------------------------------------------------------------------------------------------------------------------------------------------------------------------------------------------------------------------------------------------------------------------------|
|                    |             |          |          | stress;LOCATED IN: chloroplast, plasma membrane, membrane;EXPRESSED IN: 23 plant structures; EXPRESSED DURING: 13growth stages; BEST Arabidopsis thaliana protein matchis: unknown protein (TAIR:AT4G29780.1); Has 1807 Blasthits to 1807 proteins in 277 species: Archae - 0;Bacteria - 0; Metazoa - 736; Fungi - 347; Plants - 385;Viruses - 0; Other Eukaryotes - 339 (source: NCBI BLink).   chr5:3877975-3879483 REVERSE LENGTH=502 |
| zhu1_Ghi#S42304649 | 1.409312394 | 0        | 0        | AT3G17860.3   Symbols: JAZ3, JAI3, TIFY6B   jasmonate-zim-domain protein 3   chr3:6121143-6122691 FORWARD LENGTH=319                                                                                                                                                                                                                                                                                                                     |
| zhu1_Ghi#S33813361 | 1.401962939 | 0        | 0        | AT3G04090.1   Symbols: SIP1;1, SIP1A   small and basic intrinsic protein 1A   chr3:1072340-1074031 REVERSE LENGTH=240                                                                                                                                                                                                                                                                                                                    |
| zhu1_Ghi#S42359795 | 1.367075284 | 1.06E-12 | 5.71E-11 | AT2G41480.1   Symbols:   Peroxidase superfamily protein  chr2:17296986-17298729 REVERSE LENGTH=341                                                                                                                                                                                                                                                                                                                                       |
| zhu1_Ghi#S33824240 | 1.348992925 | 2.83E-06 | 5.45E-05 | AT1G78830.1   Symbols:   Curculin-like (mannose-binding) lectin family protein  chr1:29637141-29638508 REVERSE LENGTH=455                                                                                                                                                                                                                                                                                                                |
| zhu1_Ghi#S42310950 | 1.348992925 | 1.08E-09 | 3.49E-08 | AT4G28940.1   Symbols:   Phosphorylase superfamily protein  chr4:14274414-14276920 FORWARD LENGTH=348                                                                                                                                                                                                                                                                                                                                    |
| zhu1_Ghi#S28675209 | 1.316078303 | 1.30E-13 | 8.21E-12 | AT5G57560.1   Symbols: TCH4, XTH22   Xyloglucan endotransglucosylase/hydrolasefamily protein   chr5:23307296-23308235 REVERSELENGTH=284                                                                                                                                                                                                                                                                                                  |
| zhu1_Ghi#S31153413 | 1.312819313 | 4.92E-13 | 2.90E-11 | AT4G11650.1   Symbols: ATOSM34, OSM34   osmotin 34   chr4:7025127-7026113REVERSE LENGTH=244                                                                                                                                                                                                                                                                                                                                              |
| zhu1_Ghi#S42304188 | 1.312095013 | 1.35E-12 | 7.09E-11 | AT1G05010.1   Symbols: EFE, ACO4, EAT1   ethylene-forming enzyme  chr1:1431419-1432695 REVERSE LENGTH=323                                                                                                                                                                                                                                                                                                                                |
| zhu1_Ghi#S33811615 | 1.31151822  | 5.79E-07 | 1.28E-05 | AT4G39300.1   Symbols:   unknown protein; FUNCTIONS IN: molecular_functionunknown; INVOLVED IN: biological_process unknown;LOCATED IN: chloroplast; EXPRESSED IN: 22 plantstructures;                                                                                                                                                                                                                                                    |

EXPRESSED DURING: 13 growth stages; Has30201 Blast hits to 17322 proteins in 780 species: Archae - 12; Bacteria - 1396; Metazoa - 17338; Fungi -3422; Plants - 5037; Viruses - 0; Other Eukaryotes -2996 (source: NCBI BLink).  
| chr4:18286835-18287823 FORWARD LENGTH=96

|                    |              |           |           |                                                                                                                                |
|--------------------|--------------|-----------|-----------|--------------------------------------------------------------------------------------------------------------------------------|
| zhu1_Ghi#S42287938 | 1. 276236583 | 1. 41E-09 | 4. 47E-08 | NoHits                                                                                                                         |
| zhu1_Ghi#S33804033 | 1. 262442893 | 1. 01E-11 | 4. 30E-10 | AT4G00870.1   Symbols:   basic helix-loop-helix (bHLH) DNA-binding superfamily protein   chr4:362230-363639 REVERSE LENGTH=423 |
| zhu1_Ghi#S42282252 | 1. 255883521 | 3. 69E-14 | 4. 30E-10 | AT5G13980.2   Symbols:   Glycosyl hydrolase family 38 protein   chr5:4508626-4514334 FORWARD LENGTH=1024                       |
| zhu1_Ghi#S42281949 | 1. 243101757 | 1. 42E-09 | 4. 30E-10 | AT5G54160.1   Symbols: ATOMT1, OMT1   O-methyltransferase 1   chr5:21982075-21984167 FORWARD LENGTH=363                        |
| zhu1_Ghi#S42305093 | 1. 229693997 | 4. 08E-09 | 4. 30E-10 | AT3G02040.1   Symbols: SRG3   senescence-related gene 3   chr3:348505-349909 REVERSE LENGTH=361                                |
| zhu1_Ghi#S28641947 | 1. 229572655 | 4. 62E-13 | 4. 30E-10 | AT3G09640.2   Symbols: APX2, APX1B   ascorbate peroxidase 2   chr3:2956301-2958163 FORWARD LENGTH=251                          |
| zhu1_Ghi#S42359305 | 1. 197348399 | 8. 05E-13 | 4. 30E-10 | AT1G17020.1   Symbols: SRG1, ATSRG1   senescence-related gene 1   chr1:5820258-5821741 FORWARD LENGTH=358                      |
| zhu1_Ghi#S42328464 | 1. 195009468 | 1. 16E-10 | 4. 30E-10 | AT1G26560.1   Symbols: BGLU40   beta glucosidase 40   chr1:9178513-9181726 FORWARD LENGTH=510                                  |
| zhu1_Ghi#S42303905 | 1. 172915697 | 1. 65E-06 | 4. 30E-10 | AT1G80400.1   Symbols:   RING/U-box superfamily protein   chr1:30225864-30227360 FORWARD LENGTH=407                            |
| zhu1_Ghi#S28685483 | 1. 163164954 | 5. 30E-13 | 4. 30E-10 | AT1G77380.1   Symbols: AAP3, ATAAP3   amino acid permease 3   chr1:29075201-29077252 REVERSE LENGTH=476                        |
| zhu1_Ghi#S42324610 | 1. 139958887 | 9. 53E-06 | 4. 30E-10 | AT3G49810.1   Symbols:   ARM repeat superfamily protein   chr3:18474936-18476282 REVERSE LENGTH=448                            |
| zhu1_Ghi#S42360646 | 1. 132859494 | 5. 45E-06 | 4. 30E-10 | AT5G02160.1   Symbols:   unknown protein; FUNCTIONS IN:                                                                        |



| Accession          | Score       | E-value  | Bit Score | Description                                                                                                                                                                                                                                                                                                                                                                                                       |
|--------------------|-------------|----------|-----------|-------------------------------------------------------------------------------------------------------------------------------------------------------------------------------------------------------------------------------------------------------------------------------------------------------------------------------------------------------------------------------------------------------------------|
|                    |             |          |           | molecular_functionunknown; INVOLVED IN: biological_process<br>unknown;LOCATED IN: chloroplast thylakoid membrane; EXPRESSED IN: 23<br>plant structures; EXPRESSED DURING: 13 growthstages; Has 121 Blast hits<br>to 121 proteins in 17species: Archae - 0; Bacteria - 0; Metazoa - 0; Fungi<br>-0; Plants - 121; Viruses - 0; Other Eukaryotes - 0(source: NCBI BLink).<br>  chr5:426392-427024 FORWARDLENGTH=129 |
| zhu1_Ghi#S42291023 | 1.109679358 | 1.72E-13 | 4.30E-10  | AT4G24990.1   Symbols: ATGP4   Ubiquitin family protein<br> chr4:12849973-12851249 REVERSE LENGTH=118                                                                                                                                                                                                                                                                                                             |
| zhu1_Ghi#S28664540 | 1.102352958 | 5.83E-12 | 4.30E-10  | AT5G11160.1   Symbols: APT5   adenine phosphoribosyltransferase 5<br> chr5:3550774-3551986 FORWARD LENGTH=191                                                                                                                                                                                                                                                                                                     |
| zhu1_Ghi#S28634130 | 1.09404353  | 3.86E-13 | 4.30E-10  | AT5G43830.1   Symbols:   Aluminium induced protein with YGL and LRDR<br>motifs  chr5:17622593-17624239 REVERSE LENGTH=251                                                                                                                                                                                                                                                                                         |
| zhu1_Ghi#S42318858 | 1.092653172 | 2.57E-05 | 4.30E-10  | AT1G65840.1   Symbols: ATPA04, PA04   polyamine oxidase 4<br> chr1:24490173-24492728 FORWARD LENGTH=497                                                                                                                                                                                                                                                                                                           |
| zhu1_Ghi#S42284305 | 1.085012179 | 6.44E-07 | 4.30E-10  | AT3G19640.1   Symbols: MGT4, MRS2-3   magnesium transporter 4<br> chr3:6820969-6823104 FORWARD LENGTH=484                                                                                                                                                                                                                                                                                                         |
| zhu1_Ghi#S42335910 | 1.068092099 | 6.54E-06 | 4.30E-10  | AT1G11720.2   Symbols: SS3   starch synthase 3   chr1:3951597-3956840<br>FORWARDLENGTH=1094                                                                                                                                                                                                                                                                                                                       |
| zhu1_Ghi#S28633856 | 1.066593194 | 4.50E-06 | 4.30E-10  | AT4G35300.4   Symbols: TMT2   tonoplast monosaccharide transporter2<br> chr4:16796432-16799071 REVERSE LENGTH=739                                                                                                                                                                                                                                                                                                 |
| zhu1_Ghi#S28678461 | 1.065884079 | 5.63E-11 | 4.30E-10  | AT3G19640.1   Symbols: MGT4, MRS2-3   magnesium transporter 4<br> chr3:6820969-6823104 FORWARD LENGTH=484                                                                                                                                                                                                                                                                                                         |
| zhu1_Ghi#S42283189 | 1.065199959 | 3.09E-06 | 4.30E-10  | AT5G49665.1   Symbols:   Zinc finger (C3HC4-type RING finger) family<br>protein  chr5:20167119-20169420 REVERSE LENGTH=740                                                                                                                                                                                                                                                                                        |
| zhu1_Ghi#S42294375 | 1.057599198 | 3.42E-13 | 4.30E-10  | NoHits                                                                                                                                                                                                                                                                                                                                                                                                            |
| zhu1_Ghi#S33793881 | 1.046693637 | 1.79E-07 | 4.30E-10  | AT3G21360.1   Symbols:   2-oxoglutarate (2OG) and Fe(II)-dependent                                                                                                                                                                                                                                                                                                                                                |

|                    |              |          |          |                                                                                                                                                                                               |
|--------------------|--------------|----------|----------|-----------------------------------------------------------------------------------------------------------------------------------------------------------------------------------------------|
| zhu1_Ghi#S33810762 | 1.043366643  | 5.56E-05 | 4.30E-10 | oxygenasesuperfamily protein   chr3:7522865-7524036 FORWARDLENGTH=330<br>AT3G21510.1   Symbols: AHP1   histidine-containing phosphotransmitter<br>1   chr3:7578432-7579537 REVERSE LENGTH=154 |
| zhu1_Ghi#S42291268 | 1.04087063   | 1.23E-05 | 4.30E-10 | AT1G60970.1   Symbols:   SNARE-like superfamily protein<br> chr1:22448008-22449387 REVERSE LENGTH=177                                                                                         |
| zhu1_Ghi#S42362598 | 1.02706483   | 4.51E-06 | 4.30E-10 | AT3G04090.1   Symbols: SIP1;1, SIP1A   small and basic intrinsic protein<br>1A   chr3:1072340-1074031 REVERSE LENGTH=240                                                                      |
| zhu1_Ghi#S30007407 | 1.02272154   | 0        | 4.30E-10 | AT4G16260.1   Symbols:   Glycosyl hydrolase superfamily protein<br> chr4:9200180-9201441 REVERSE LENGTH=344                                                                                   |
| zhu1_Ghi#S28680014 | 1.014991998  | 5.08E-06 | 4.30E-10 | AT3G51520.1   Symbols:   diacylglycerol acyltransferase family<br> chr3:19110739-19112518 FORWARD LENGTH=314                                                                                  |
| zhu1_Ghi#S42284281 | 1.010945165  | 2.60E-08 | 4.30E-10 | AT5G46750.1   Symbols: AGD9   ARF-GAP domain 9   chr5:18969950-18971817<br>REVERSELENGTH=402                                                                                                  |
| zhu1_Ghi#S28642376 | -1.008854744 | 7.79E-20 | 4.30E-10 | AT4G17670.1   Symbols:   Protein of unknown function (DUF581)<br> chr4:9833948-9834663 REVERSE LENGTH=159                                                                                     |
| zhu1_Ghi#S28670623 | -1.016789459 | 8.41E-08 | 4.30E-10 | AT1G50590.1   Symbols:   RmlC-like cupins superfamily protein<br> chr1:18732378-18734053 REVERSE LENGTH=310                                                                                   |
| zhu1_Ghi#S42302947 | -1.01971194  | 3.64E-36 | 4.30E-10 | AT3G47730.1   Symbols: ATATH1, ATH1, ABCA2   ATP-binding cassette A2<br> chr3:17594342-17598828 REVERSE LENGTH=983                                                                            |
| zhu1_Ghi#S42287337 | -1.020448631 | 7.48E-37 | 4.30E-10 | AT2G15580.1   Symbols:   RING/U-box superfamily protein  <br>chr2:6797687-6798815FORWARD LENGTH=196                                                                                           |
| zhu1_Ghi#S28708850 | -1.022688205 | 3.63E-33 | 4.30E-10 | AT1G70170.1   Symbols: MMP   matrix metalloproteinase  <br>chr1:26424005-26425141FORWARD LENGTH=378                                                                                           |
| zhu1_Ghi#S28679896 | -1.025023681 | 7.28E-07 | 4.30E-10 | AT5G49520.1   Symbols: WRKY48, ATWRKY48   WRKY DNA-binding protein 48<br> chr5:20090890-20092867 FORWARD LENGTH=399                                                                           |
| zhu1_Ghi#S34535654 | -1.028788404 | 4.34E-32 | 4.30E-10 | AT1G80840.1   Symbols: WRKY40, ATWRKY40   WRKY DNA-binding protein 40                                                                                                                         |

|                    |              |          |          |                                                                                                                                                                                                                                                                                                                                                            |
|--------------------|--------------|----------|----------|------------------------------------------------------------------------------------------------------------------------------------------------------------------------------------------------------------------------------------------------------------------------------------------------------------------------------------------------------------|
|                    |              |          |          | chr1:30383834-30385356 FORWARD LENGTH=302                                                                                                                                                                                                                                                                                                                  |
| zhu1_Ghi#S42291871 | -1.034711367 | 5.46E-08 | 4.30E-10 | NoHits                                                                                                                                                                                                                                                                                                                                                     |
| zhu1_Ghi#S33812841 | -1.034862919 | 4.56E-06 | 4.30E-10 | AT2G29500.1   Symbols:   HSP20-like chaperones superfamily protein<br> chr2:12633279-12633740 REVERSE LENGTH=153                                                                                                                                                                                                                                           |
| zhu1_Ghi#S42296316 | -1.042837183 | 3.07E-13 | 4.30E-10 | AT5G54770.1   Symbols: THI1, TZ, THI4   thiazole biosynthetic<br>enzyme, chloroplast (ARA6) (THI1) (THI4)  chr5:22246634-22247891<br>FORWARD LENGTH=349                                                                                                                                                                                                    |
| zhu1_Ghi#S28674764 | -1.049556451 | 4.69E-06 | 4.30E-10 | NoHits                                                                                                                                                                                                                                                                                                                                                     |
| zhu1_Ghi#S42303993 | -1.052662362 | 4.04E-05 | 4.30E-10 | AT1G50650.1   Symbols:   Stigma-specific Stigl family protein<br> chr1:18763773-18764297 REVERSE LENGTH=174                                                                                                                                                                                                                                                |
| zhu1_Ghi#S42324594 | -1.058775486 | 1.93E-55 | 4.30E-10 | NoHits                                                                                                                                                                                                                                                                                                                                                     |
| zhu1_Ghi#S28674386 | -1.058795906 | 1.25E-10 | 4.30E-10 | AT2G46400.1   Symbols: WRKY46, ATWRKY46   WRKY DNA-binding protein 46<br> chr2:19043676-19044754 REVERSE LENGTH=295                                                                                                                                                                                                                                        |
| zhu1_Ghi#S33785628 | -1.068092403 | 2.96E-05 | 4.30E-10 | AT4G33040.1   Symbols:   Thioredoxin superfamily protein<br> chr4:15940779-15941213 REVERSE LENGTH=144                                                                                                                                                                                                                                                     |
| zhu1_Ghi#S28691495 | -1.076439746 | 2.36E-12 | 4.30E-10 | AT5G15780.1   Symbols:   Pollen Ole e 1 allergen and extensin family<br>protein  chr5:5144898-5146297 REVERSE LENGTH=401                                                                                                                                                                                                                                   |
| zhu1_Ghi#S28670636 | -1.083359159 | 2.16E-05 | 4.30E-10 | AT1G22470.1   Symbols:   unknown protein; BEST Arabidopsis thaliana<br>proteinmatch is: unknown protein (TAIR:AT1G72240.1); Has 1693Blast hits<br>to 236 proteins in 54 species: Archae - 0;Bacteria - 8; Metazoa - 451;<br>Fungi - 116; Plants - 94;Viruses - 2; Other Eukaryotes - 1022 (source:<br>NCBIlink).   chr1:7932908-7933348 REVERSE LENGTH=146 |
| zhu1_Ghi#S28675029 | -1.084580526 | 2.10E-17 | 4.30E-10 | AT1G14870.1   Symbols: PCR2   PLANT CADMIUM RESISTANCE 2  <br>chr1:5128591-5129458REVERSE LENGTH=152                                                                                                                                                                                                                                                       |
| zhu1_Ghi#S42302358 | -1.09029212  | 6.97E-07 | 4.30E-10 | NoHits                                                                                                                                                                                                                                                                                                                                                     |
| zhu1_Ghi#S33790886 | -1.09077166  | 9.54E-06 | 4.30E-10 | AT5G49760.1   Symbols:   Leucine-rich repeat protein kinase family                                                                                                                                                                                                                                                                                         |

|                    |              |           |          |                                                                                                                                      |
|--------------------|--------------|-----------|----------|--------------------------------------------------------------------------------------------------------------------------------------|
|                    |              |           |          | protein  chr5:20216679-20221052 FORWARD LENGTH=953                                                                                   |
| zhu1_Ghi#S28642634 | -1.092350337 | 8.26E-20  | 4.30E-10 | AT2G40750.1   Symbols: WRKY54, ATWRKY54   WRKY DNA-binding protein 54<br> chr2:17000636-17002354 REVERSE LENGTH=346                  |
| zhu1_Ghi#S28674900 | -1.097921947 | 2.78E-22  | 4.30E-10 | AT1G66880.1   Symbols:   Protein kinase superfamily protein<br> chr1:24946928-24955438 FORWARD LENGTH=1296                           |
| zhu1_Ghi#S28642615 | -1.099312456 | 3.79E-08  | 4.30E-10 | AT1G14870.1   Symbols: PCR2   PLANT CADMIUM RESISTANCE 2  <br>chr1:5128591-5129458REVERSE LENGTH=152                                 |
| zhu1_Ghi#S33796588 | -1.10039203  | 4.15E-63  | 4.30E-10 | NoHits                                                                                                                               |
| zhu1_Ghi#S33803441 | -1.104846845 | 6.94E-06  | 4.30E-10 | AT3G51325.1   Symbols:   RING/U-box superfamily protein<br> chr3:19052259-19052531 FORWARD LENGTH=90                                 |
| zhu1_Ghi#S42282492 | -1.118786036 | 9.97E-11  | 4.30E-10 | AT1G78700.1   Symbols: BEH4   BES1/BZR1 homolog 4  <br>chr1:29599854-29601539FORWARD LENGTH=325                                      |
| zhu1_Ghi#S28679948 | -1.120161123 | 1.95E-13  | 4.30E-10 | AT5G26330.1   Symbols:   Cupredoxin superfamily protein  <br>chr5:9241614-9242635REVERSE LENGTH=187                                  |
| zhu1_Ghi#S42314147 | -1.127170797 | 4.04E-24  | 4.30E-10 | AT2G33770.1   Symbols: UBC24, ATUBC24, PHO2   phosphate 2<br> chr2:14277785-14281482 REVERSE LENGTH=907                              |
| zhu1_Ghi#S42276811 | -1.133399842 | 2.37E-08  | 4.30E-10 | NoHits                                                                                                                               |
| zhu1_Ghi#S33824436 | -1.155939998 | 1.78E-14  | 4.30E-10 | NoHits                                                                                                                               |
| zhu1_Ghi#S39759484 | -1.163696101 | 0         | 4.30E-10 | NoHits                                                                                                                               |
| zhu1_Ghi#S28705090 | -1.184439275 | 1.13E-05  | 4.30E-10 | AT1G65890.1   Symbols: AAE12   acyl activating enzyme 12  <br>chr1:24512598-24514611REVERSE LENGTH=578                               |
| zhu1_Ghi#S42323087 | -1.188441206 | 5.84E-22  | 4.30E-10 | AT3G14610.1   Symbols: CYP72A7   cytochrome P450, family 72, subfamily<br>A, polypeptide 7   chr3:4912565-4914503 FORWARD LENGTH=512 |
| zhu1_Ghi#S30011418 | -1.191601997 | 5.09E-146 | 4.30E-10 | AT1G28280.2   Symbols:   VQ motif-containing protein  <br>chr1:9886297-9887395REVERSE LENGTH=243                                     |
| zhu1_Ghi#S33804996 | -1.193133378 | 1.65E-44  | 4.30E-10 | AT3G28510.1   Symbols:   P-loop containing nucleoside triphosphate                                                                   |



|                    |              |          |          |                                                                                                                                                                                                                                                                                                                                                                                                                                                                                                                                                                                                                                                    |
|--------------------|--------------|----------|----------|----------------------------------------------------------------------------------------------------------------------------------------------------------------------------------------------------------------------------------------------------------------------------------------------------------------------------------------------------------------------------------------------------------------------------------------------------------------------------------------------------------------------------------------------------------------------------------------------------------------------------------------------------|
|                    |              |          |          | hydrolasessuperfamily protein   chr3:10685656-10687248<br>FORWARDLENGTH=530                                                                                                                                                                                                                                                                                                                                                                                                                                                                                                                                                                        |
| zhu1_Ghi#S33825092 | -1.199139205 | 2.55E-20 | 4.30E-10 | NoHits                                                                                                                                                                                                                                                                                                                                                                                                                                                                                                                                                                                                                                             |
| zhu1_Ghi#S28643979 | -1.223216092 | 0        | 4.30E-10 | NoHits                                                                                                                                                                                                                                                                                                                                                                                                                                                                                                                                                                                                                                             |
| zhu1_Ghi#S30016112 | -1.227299981 | 2.67E-20 | 4.30E-10 | NoHits                                                                                                                                                                                                                                                                                                                                                                                                                                                                                                                                                                                                                                             |
| zhu1_Ghi#S42293757 | -1.241606683 | 2.49E-20 | 4.30E-10 | AT5G49610.1   Symbols:   F-box family protein   chr5:20131448-20132527<br>REVERSELENGTH=359                                                                                                                                                                                                                                                                                                                                                                                                                                                                                                                                                        |
| zhu1_Ghi#S42360778 | -1.244237192 | 6.41E-20 | 4.30E-10 | AT1G29340.1   Symbols: PUB17, ATPUB17   plant U-box 17  <br>chr1:10264412-10266601FORWARD LENGTH=729<br>AT5G61820.1   Symbols:   FUNCTIONS IN: molecular_function unknown;<br>INVOLVEDIN: biological_process unknown; LOCATED IN: vacuole;EXPRESSED<br>IN: 24 plant structures; EXPRESSED DURING: 15growth stages; CONTAINS<br>InterPro DOMAIN/s: Stressup-regulated Nod 19 (InterPro:IPR011692); Has<br>30201Blast hits to 17322 proteins in 780 species: Archae -12; Bacteria<br>- 1396; Metazoa - 17338; Fungi - 3422;Plants - 5037; Viruses - 0; Other<br>Eukaryotes - 2996(source: NCBI BLink).   chr5:24834505-24836223<br>REVERSELENGTH=475 |
| zhu1_Ghi#S28675946 | -1.249266398 | 3.39E-07 | 4.30E-10 | AT1G49570.1   Symbols:   Peroxidase superfamily protein<br> chr1:18347077-18348712 FORWARD LENGTH=350                                                                                                                                                                                                                                                                                                                                                                                                                                                                                                                                              |
| zhu1_Ghi#S33817364 | -1.250469145 | 3.72E-31 | 4.30E-10 | AT3G44350.2   Symbols: anac061, NAC061   NAC domain containing protein<br>61  chr3:16022836-16024487 REVERSE LENGTH=241                                                                                                                                                                                                                                                                                                                                                                                                                                                                                                                            |
| zhu1_Ghi#S33816319 | -1.253043089 | 6.50E-06 | 4.30E-10 | AT2G17220.2   Symbols:   Protein kinase superfamily protein<br> chr2:7487866-7489768 REVERSE LENGTH=413                                                                                                                                                                                                                                                                                                                                                                                                                                                                                                                                            |
| zhu1_Ghi#S28675015 | -1.253043089 | 1.09E-08 | 4.30E-10 | AT3G47780.1   Symbols: ATATH6, ATH6   ABC2 homolog 6  <br>chr3:17624500-17628972FORWARD LENGTH=935                                                                                                                                                                                                                                                                                                                                                                                                                                                                                                                                                 |
| zhu1_Ghi#S33796319 | -1.264166467 | 1.49E-16 | 4.30E-10 | NoHits                                                                                                                                                                                                                                                                                                                                                                                                                                                                                                                                                                                                                                             |
| zhu1_Ghi#S42304308 | -1.269552176 | 1.44E-07 | 4.30E-10 | NoHits                                                                                                                                                                                                                                                                                                                                                                                                                                                                                                                                                                                                                                             |

|                    |              |           |          |                                                                                                                                               |
|--------------------|--------------|-----------|----------|-----------------------------------------------------------------------------------------------------------------------------------------------|
| zhu1_Ghi#S28694760 | -1.27549794  | 1.33E-11  | 4.30E-10 | AT3G54040.1   Symbols:   PAR1 protein   chr3:20014032-20015299<br>REVERSELENGTH=183                                                           |
| zhu1_Ghi#S33807838 | -1.280507972 | 2.94E-15  | 4.30E-10 | AT2G45760.1   Symbols: BAP2, BAL   BON association protein 2<br> chr2:18847125-18847748 REVERSE LENGTH=207                                    |
| zhu1_Ghi#S33822352 | -1.286595649 | 5.70E-16  | 4.30E-10 | AT4G27740.1   Symbols:   Yippee family putative zinc-binding protein<br> chr4:13839148-13839616 FORWARD LENGTH=105                            |
| zhu1_Ghi#S33806012 | -1.286750619 | 5.87E-31  | 4.30E-10 | AT1G01490.2   Symbols:   Heavy metal transport/detoxification<br>superfamilyprotein   chr1:180401-182066 REVERSE LENGTH=177                   |
| zhu1_Ghi#S29394665 | -1.298421084 | 6.63E-13  | 4.30E-10 | AT5G48290.1   Symbols:   Heavy metal transport/detoxification<br>superfamilyprotein   chr5:19568980-19569658 FORWARD LENGTH=181               |
| zhu1_Ghi#S42359955 | -1.304386039 | 5.16E-23  | 4.30E-10 | AT2G46400.1   Symbols: WRKY46, ATWRKY46   WRKY DNA-binding protein 46<br> chr2:19043676-19044754 REVERSE LENGTH=295                           |
| zhu1_Ghi#S28644704 | -1.313607766 | 0         | 4.30E-10 | AT3G51430.1   Symbols: YLS2, SSL5   Calcium-dependent<br>phosphotriesterasesuperfamily protein   chr3:19086548-19087909<br>FORWARDLENGTH=371  |
| zhu1_Ghi#S28674653 | -1.321389559 | 9.05E-16  | 4.30E-10 | AT2G45760.1   Symbols: BAP2, BAL   BON association protein 2<br> chr2:18847125-18847748 REVERSE LENGTH=207                                    |
| zhu1_Ghi#S28673288 | -1.328415824 | 1.81E-06  | 4.30E-10 | AT3G09270.1   Symbols: ATGSTU8, GSTU8   glutathione S-transferase TAU<br>8  chr3:2848407-2849226 REVERSE LENGTH=224                           |
| zhu1_Ghi#S30006882 | -1.329326674 | 4.39E-15  | 4.30E-10 | AT5G52740.1   Symbols:   Copper transport protein family<br> chr5:21382530-21383180 FORWARD LENGTH=118                                        |
| zhu1_Ghi#S33816968 | -1.338219634 | 2.01E-10  | 4.30E-10 | NoHits                                                                                                                                        |
| zhu1_Ghi#S33812971 | -1.351446793 | 4.71E-06  | 4.30E-10 | NoHits                                                                                                                                        |
| zhu1_Ghi#S39759481 | -1.37140586  | 0         | 4.30E-10 | NoHits                                                                                                                                        |
| zhu1_Ghi#S33826018 | -1.372809572 | 7.56E-218 | 4.30E-10 | AT3G11810.1   Symbols:   unknown protein; BEST Arabidopsis thaliana<br>proteinmatch is: unknown protein (TAIR:AT2G03330.1); Has 141Blast hits |

|                    |              |           |          |                                                                                                                                                                                                                                                                                                                                                                                                              |
|--------------------|--------------|-----------|----------|--------------------------------------------------------------------------------------------------------------------------------------------------------------------------------------------------------------------------------------------------------------------------------------------------------------------------------------------------------------------------------------------------------------|
|                    |              |           |          | to 141 proteins in 21 species: Archae - 0;Bacteria - 9; Metazoa - 0; Fungi - 0; Plants - 131;Viruses - 0; Other Eukaryotes - 1 (source: NCBI BLink).   chr3:3727819-3728865 FORWARD LENGTH=348                                                                                                                                                                                                               |
| zhu1_Ghi#S28671078 | -1.376344667 | 1.79E-54  | 4.30E-10 | AT2G15220.1   Symbols:   Plant basic secretory protein (BSP) family protein  chr2:6608689-6609366 FORWARD LENGTH=225                                                                                                                                                                                                                                                                                         |
| zhu1_Ghi#S42317713 | -1.413507761 | 3.33E-11  | 4.30E-10 | AT3G63380.1   Symbols:   ATPase E1-E2 type family protein / haloaciddehalogenase-like hydrolase family protein  chr3:23407112-23410213 REVERSE LENGTH=1033                                                                                                                                                                                                                                                   |
| zhu1_Ghi#S33840038 | -1.417237264 | 3.77E-12  | 4.30E-10 | AT3G22142.1   Symbols:   Bifunctional inhibitor/lipid-transfer protein/seedstorage 2S albumin superfamily protein  chr3:7803604-7808046 REVERSE LENGTH=1480                                                                                                                                                                                                                                                  |
| zhu1_Ghi#S28675845 | -1.419318254 | 1.25E-110 | 4.30E-10 | AT4G39830.1   Symbols:   Cupredoxin superfamily protein   chr4:18479103-18481184FORWARD LENGTH=582                                                                                                                                                                                                                                                                                                           |
| zhu1_Ghi#S42280641 | -1.427554329 | 0         | 4.30E-10 | AT1G60420.1   Symbols:   DC1 domain-containing protein   chr1:22261978-22264243FORWARD LENGTH=578                                                                                                                                                                                                                                                                                                            |
| zhu1_Ghi#S33782966 | -1.443825904 | 6.40E-12  | 4.30E-10 | AT3G13130.1   Symbols:   unknown protein; FUNCTIONS IN: molecular_functionunknown; INVOLVED IN: biological_process unknown;LOCATED IN: endomembrane system; EXPRESSED IN: malegametophyte; Has 140 Blast hits to 132 proteins in 41species: Archae - 2; Bacteria - 4; Metazoa - 29; Fungi -20; Plants - 51; Viruses - 0; Other Eukaryotes - 34(source: NCBI BLink).   chr3:4223008-4223613 FORWARDLENGTH=201 |
| zhu1_Ghi#S42291130 | -1.452239361 | 1.70E-234 | 4.30E-10 | AT5G17540.1   Symbols:   HXXXD-type acyl-transferase family protein  chr5:5782061-5783682 REVERSE LENGTH=461                                                                                                                                                                                                                                                                                                 |
| zhu1_Ghi#S28676876 | -1.517596306 | 1.33E-26  | 4.30E-10 | AT5G40990.1   Symbols: GLIP1   GDSL lipase 1   chr5:16418920-16420400 FORWARDLENGTH=374                                                                                                                                                                                                                                                                                                                      |
| zhu1_Ghi#S28656788 | -1.525476193 | 9.93E-08  | 4.30E-10 | AT5G55260.1   Symbols: PPX2, PPX-2   protein phosphatase X 2                                                                                                                                                                                                                                                                                                                                                 |

|                    |              |           |          |                                                                        |
|--------------------|--------------|-----------|----------|------------------------------------------------------------------------|
|                    |              |           |          | chr5:22416808-22418621 FORWARD LENGTH=305                              |
|                    |              |           |          | AT4G14680.1   Symbols: APS3   Pseudouridine                            |
| zhu1_Ghi#S42333464 | -1.532792605 | 4.07E-128 | 4.30E-10 | synthase/archaeosinetransglycosylase-like family protein               |
|                    |              |           |          | chr4:8413443-8415311 REVERSE LENGTH=465                                |
| zhu1_Ghi#S28696727 | -1.55789767  | 1.97E-09  | 4.30E-10 | AT5G47850.1   Symbols: CCR4   CRINKLY4 related 4                       |
|                    |              |           |          | chr5:19378803-19381058 REVERSELENGTH=751                               |
| zhu1_Ghi#S33846154 | -1.566694619 | 5.17E-26  | 4.30E-10 | AT5G24530.1   Symbols: DMR6   2-oxoglutarate (2OG) and                 |
|                    |              |           |          | Fe(II)-dependentoxygenase superfamily protein                          |
|                    |              |           |          | chr5:8378964-8383154FORWARD LENGTH=341                                 |
| zhu1_Ghi#S33784617 | -1.578067255 | 0         | 4.30E-10 | AT5G20230.1   Symbols: ATBCB, BCB, SAG14   blue-copper-binding protein |
|                    |              |           |          | chr5:6826626-6827408 FORWARD LENGTH=196                                |
| zhu1_Ghi#S28670457 | -1.580051962 | 2.75E-183 | 4.30E-10 | AT3G56400.1   Symbols: WRKY70, ATWRKY70   WRKY DNA-binding protein 70  |
|                    |              |           |          | chr3:20909082-20910409 REVERSE LENGTH=294                              |
| zhu1_Ghi#S28671572 | -1.581087298 | 1.56E-67  | 4.30E-10 | AT5G64810.1   Symbols: WRKY51, ATWRKY51   WRKY DNA-binding protein 51  |
|                    |              |           |          | chr5:25908415-25909687 FORWARD LENGTH=194                              |
| zhu1_Ghi#S28676234 | -1.586466823 | 1.01E-24  | 4.30E-10 | NoHits                                                                 |
| zhu1_Ghi#S42288583 | -1.590355621 | 1.11E-69  | 4.30E-10 | AT4G39330.1   Symbols: ATCAD9, CAD9   cinnamyl alcohol dehydrogenase 9 |
|                    |              |           |          | chr4:18291268-18292772 FORWARD LENGTH=360                              |
| zhu1_Ghi#S33847052 | -1.597426035 | 4.48E-07  | 4.30E-10 | AT2G41180.1   Symbols:   VQ motif-containing protein                   |
|                    |              |           |          | chr2:17165242-17165667FORWARD LENGTH=141                               |
| zhu1_Ghi#S42306157 | -1.599717846 | 1.00E-33  | 4.30E-10 | AT4G34138.1   Symbols: UGT73B1   UDP-glucosyl transferase 73B1         |
|                    |              |           |          | chr4:16348267-16349858 REVERSE LENGTH=488                              |
| zhu1_Ghi#S28644399 | -1.617194854 | 2.50E-36  | 4.30E-10 | AT4G21700.1   Symbols:   Protein of unknown function (DUF2921)         |
|                    |              |           |          | chr4:11529956-11532844 FORWARD LENGTH=962                              |
| zhu1_Ghi#S33810112 | -1.617747526 | 1.40E-45  | 4.30E-10 | AT5G54490.1   Symbols: PBP1   pinoid-binding protein 1                 |
|                    |              |           |          | chr5:22121458-22121841FORWARD LENGTH=127                               |

|                    |              |           |          |                                                                                                                                        |
|--------------------|--------------|-----------|----------|----------------------------------------------------------------------------------------------------------------------------------------|
| zhu1_Ghi#S42328484 | -1.629377059 | 1.35E-27  | 4.30E-10 | AT1G01490.2   Symbols:   Heavy metal transport/detoxification superfamilyprotein   chr1:180401-182066 REVERSE LENGTH=177               |
| zhu1_Ghi#S33803678 | -1.632595038 | 4.52E-53  | 4.30E-10 | AT1G19640.1   Symbols: JMT   jasmonic acid carboxyl methyltransferase  chr1:6789166-6791708 REVERSE LENGTH=389                         |
| zhu1_Ghi#S33805995 | -1.635900182 | 6.89E-06  | 4.30E-10 | AT4G13395.1   Symbols: DVL10, RTFL12   ROTUNDIFOLIA like 12  chr4:7785883-7786050 REVERSE LENGTH=55                                    |
| zhu1_Ghi#S33799972 | -1.635900182 | 1.44E-16  | 4.30E-10 | AT5G45520.1   Symbols:   Leucine-rich repeat (LRR) family protein  chr5:18449509-18453012 REVERSE LENGTH=1167                          |
| zhu1_Ghi#S42315404 | -1.638068019 | 2.82E-10  | 4.30E-10 | AT3G60220.1   Symbols: AT4, TL4   TOXICOS EN LEVADURA 4  chr3:22254790-22255794 REVERSE LENGTH=334                                     |
| zhu1_Ghi#S28671549 | -1.651007075 | 3.37E-05  | 4.30E-10 | NoHits                                                                                                                                 |
| zhu1_Ghi#S33814007 | -1.673374888 | 1.32E-19  | 4.30E-10 | AT5G26170.1   Symbols: WRKY50, ATWRKY50   WRKY DNA-binding protein 50  chr5:9147176-9148128 REVERSE LENGTH=173                         |
| zhu1_Ghi#S28671034 | -1.674047316 | 5.20E-89  | 4.30E-10 | AT5G25250.1   Symbols:   SPFH/Band 7/PHB domain-containing membrane-associatedprotein family   chr5:8749774-8751430 FORWARD LENGTH=470 |
| zhu1_Ghi#S42302985 | -1.692970368 | 1.16E-148 | 4.30E-10 | AT5G57580.1   Symbols:   Calmodulin-binding protein   chr5:23314994-23317683REVERSE LENGTH=647                                         |
| zhu1_Ghi#S28645041 | -1.698760206 | 6.33E-05  | 4.30E-10 | AT2G15220.1   Symbols:   Plant basic secretory protein (BSP) family protein  chr2:6608689-6609366 FORWARD LENGTH=225                   |
| zhu1_Ghi#S29994235 | -1.705651291 | 1.60E-20  | 4.30E-10 | AT4G38780.1   Symbols:   Pre-mRNA-processing-splicing factor  chr4:18101438-18111029 REVERSE LENGTH=2332                               |
| zhu1_Ghi#S33803261 | -1.730919563 | 3.07E-86  | 4.30E-10 | AT2G29420.1   Symbols: ATGSTU7, GST25, GSTU7   glutathione S-transferase tau 7   chr2:12618111-12618871 REVERSE LENGTH=227             |
| zhu1_Ghi#S42325367 | -1.752870803 | 3.58E-40  | 4.30E-10 | AT4G22200.1   Symbols: AKT2/3, AKT3, AKT2, KT2/3   potassium transport 2/3  chr4:11746666-11750091 REVERSE LENGTH=802                  |



|                    |              |           |          |                                                                                                                                                                              |
|--------------------|--------------|-----------|----------|------------------------------------------------------------------------------------------------------------------------------------------------------------------------------|
| zhu1_Ghi#S45786034 | -1.785703588 | 4.45E-73  | 4.30E-10 | AT2G31880.1   Symbols: SOBIR1, EVR   Leucine-rich repeat protein kinase familyprotein   chr2:13554920-13556845 FORWARD LENGTH=641                                            |
| zhu1_Ghi#S42297319 | -1.791909175 | 2.36E-18  | 4.30E-10 | AT5G66900.1   Symbols:   Disease resistance protein (CC-NBS-LRR class) family  chr5:26714931-26717757 REVERSE LENGTH=809                                                     |
| zhu1_Ghi#S42300351 | -1.847404288 | 2.63E-26  | 4.30E-10 | NoHits                                                                                                                                                                       |
| zhu1_Ghi#S28677246 | -1.86046044  | 1.95E-08  | 4.30E-10 | NoHits                                                                                                                                                                       |
| zhu1_Ghi#S30015851 | -1.873399496 | 3.44E-12  | 4.30E-10 | AT2G18670.1   Symbols:   RING/U-box superfamily protein   chr2:8093469-8094452FORWARD LENGTH=181                                                                             |
| zhu1_Ghi#S33806908 | -1.876719854 | 9.00E-24  | 4.30E-10 | NoHits                                                                                                                                                                       |
| zhu1_Ghi#S28642358 | -1.903033157 | 2.82E-15  | 4.30E-10 | AT3G49930.1   Symbols:   C2H2 and C2HC zinc fingers superfamily protein  chr3:18510246-18510893 FORWARD LENGTH=215                                                           |
| zhu1_Ghi#S28674399 | -1.926285076 | 1.12E-22  | 4.30E-10 | NoHits                                                                                                                                                                       |
| zhu1_Ghi#S42331422 | -1.933764572 | 5.34E-45  | 4.30E-10 | AT5G66590.1   Symbols:   CAP (Cysteine-rich secretory proteins, Antigen 5, andPathogenesis-related 1 protein) superfamily protein  chr5:26574255-26574812 FORWARD LENGTH=185 |
| zhu1_Ghi#S42315219 | -1.936409294 | 5.08E-21  | 4.30E-10 | AT3G56400.1   Symbols: WRKY70, ATWRKY70   WRKY DNA-binding protein 70  chr3:20909082-20910409 REVERSE LENGTH=294                                                             |
| zhu1_Ghi#S42355978 | -1.961282397 | 9.58E-164 | 4.30E-10 | AT3G50770.1   Symbols: CML41   calmodulin-like 41   chr3:18873987-18874604FORWARD LENGTH=205                                                                                 |
| zhu1_Ghi#S33817225 | -1.966480148 | 2.77E-24  | 4.30E-10 | AT1G09240.1   Symbols: NAS3, ATNAS3   nicotianamine synthase 3  chr1:2984950-2985912 FORWARD LENGTH=320                                                                      |
| zhu1_Ghi#S28686653 | -2.006882502 | 1.84E-10  | 4.30E-10 | AT5G66850.1   Symbols: MAPKKK5   mitogen-activated protein kinase kinase kinase 5  chr5:26695965-26699159 REVERSE LENGTH=716                                                 |
| zhu1_Ghi#S28636992 | -2.063132979 | 3.31E-30  | 4.30E-10 | AT3G54420.1   Symbols: ATEP3, ATCHITIV, CHIV, EP3   homolog of carrot EP3-3chitinase   chr3:20145935-20147034 FORWARD LENGTH=273                                             |
| zhu1_Ghi#S28670485 | -2.114767864 | 2.62E-61  | 4.30E-10 | AT4G19950.1   Symbols:   unknown protein; BEST Arabidopsis thaliana                                                                                                          |

proteinmatch is: unknown protein (TAIR:AT5G44860.1); Has 338Blast hits to 330 proteins in 72 species: Archae - 2;Bacteria - 94; Metazoa - 7; Fungi - 0; Plants - 232;Viruses - 0; Other Eukaryotes - 3 (source: NCBI BLink). | chr4:10809977-10810942 FORWARD LENGTH=321

|                    |              |           |          |                                                                                                                                    |
|--------------------|--------------|-----------|----------|------------------------------------------------------------------------------------------------------------------------------------|
| zhu1_Ghi#S28674059 | -2.193381947 | 1.60E-30  | 4.30E-10 | AT3G09270.1   Symbols: ATGSTU8, GSTU8   glutathione S-transferase TAU8   chr3:2848407-2849226 REVERSE LENGTH=224                   |
| zhu1_Ghi#S33804973 | -2.235969576 | 4.41E-10  | 4.30E-10 | AT4G19840.1   Symbols: ATPP2-A1, ATPP2A-1, PP2-A1   phloem protein 2-A1   chr4:10774336-10775701 FORWARD LENGTH=246                |
| zhu1_Ghi#S30007330 | -2.237979367 | 1.51E-156 | 4.30E-10 | NoHits                                                                                                                             |
| zhu1_Ghi#S33784215 | -2.314626519 | 1.75E-93  | 4.30E-10 | AT3G54420.1   Symbols: ATEP3, ATCHITIV, CHIV, EP3   homolog of carrot EP3-3chitinase   chr3:20145935-20147034 FORWARD LENGTH=273   |
| zhu1_Ghi#S33822350 | -2.330487174 | 8.23E-12  | 4.30E-10 | NoHits                                                                                                                             |
| zhu1_Ghi#S33804884 | -2.342437963 | 6.13E-115 | 4.30E-10 | NoHits                                                                                                                             |
| zhu1_Ghi#S33808979 | -2.359958293 | 3.82E-10  | 4.30E-10 | NoHits                                                                                                                             |
| zhu1_Ghi#S28671517 | -2.365252593 | 1.50E-28  | 4.30E-10 | AT3G56400.1   Symbols: WRKY70, ATWRKY70   WRKY DNA-binding protein 70   chr3:20909082-20910409 REVERSE LENGTH=294                  |
| zhu1_Ghi#S42310242 | -2.621462799 | 3.90E-35  | 4.30E-10 | AT4G31950.1   Symbols: CYP82C3   cytochrome P450, family 82, subfamily C, polypeptide 3   chr4:15455163-15457090 FORWARDLENGTH=512 |
| zhu1_Ghi#S42319364 | -4.481381189 | 0         | 4.30E-10 | AT4G31940.1   Symbols: CYP82C4   cytochrome P450, family 82, subfamily C, polypeptide 4   chr4:15452040-15453966 FORWARDLENGTH=524 |
| zhu1_Ghi#S28692004 | -14.35294343 | 6.19E-29  | 4.30E-10 | AT4G21410.1   Symbols: CRK29   cysteine-rich RLK (RECEPTOR-like protein kinase)29   chr4:11402463-11405025 REVERSE LENGTH=679      |

**Supplementary Table 2** Primers used in this study. The primers of qRT-PCR are marked by the ‘RL’, The primers of RT-PCR are marked by the ‘RT’.

| <b>Gene name</b> | <b>Forward primer</b>                                              | <b>Reverse primer</b>                                         |
|------------------|--------------------------------------------------------------------|---------------------------------------------------------------|
| SSN-RL           | CTTGGGTTACAACATGCCATGT                                             | ATTGAGCCTTCTATTTCCGAGAC                                       |
| SSN1-RL          | GACCAACATTAATCTACCCCGCT                                            | ACCGTAAGAACCAAATGCTAAACC                                      |
| SSN2-RL          | GACTAACATTAATCTACACCGCTTGA                                         | ATTGTTCTTCACACCTGATTATTGCT                                    |
| SSN3-RL          | ATGGTTTGATTGACTGACTGGGAC                                           | GCTTGATTACTGGAATCTTCAACTGG                                    |
| SSNi             | GGGGACAATTTGTACAAAAAAGCAGG<br>CTGCAGTGTGTTGCAGAGGAAGACC<br>AGA     | GGGGACCACTTTGTACAAGAAAGCTGGGT<br>GACACCAATTTGCCGATGTCTGTTT    |
| SSN1oe           | GGGGACAAGTTTGTACAAAAAAGCAG<br>GCTGCATCTCTACACTTCTTAACACA<br>GCAG   | GGGGACCACTTTGTACAAGAAAGCTGGGT<br>GTTCTGTCCTTCACACTTTATTATTGC  |
| SSN2oe           | GGGGACAAGTTTGTACAAAAAAGCAG<br>GCTGCCAACAACCTTCTCAGAAGATCT<br>CTGCA | GGGGACCACTTTGTACAAGAAAGCTGGGT<br>CTTGTTCTTCACACCTGATTATTGCT   |
| SSN3             | ATGGATCTTCTTGATCTCTATTTTTG<br>GC                                   | ATGCTTGATTACTGGAATCTTCAACTGG                                  |
| UTR1i            | GGGGACAAGTTTGTACAAAAAAGCAG<br>GCTGCGATTGCAATAATAAAGTGTGA<br>AGGAC  | GGGGACCACTTTGTACAAGAAAGCTGGGT<br>GTTTAAAAAGAAATGGAATATATTTTGC |
| UTR2i            | GGGGACAAGTTTGTACAAAAAAGCAG<br>GCTGCATTAATAATTTAGATGAAGATA<br>GCAA  | GGGGACCACTTTGTACAAGAAAGCTGGGT<br>GTCTCTAACAAATATTTGTTATTTATTA |
| UTR3i            | GGGGACAAGTTTGTACAAAAAAGCAG<br>GCTGCAATCCAGTTGAAGATTCCAGTA<br>ATC   | GGGGACCACTTTGTACAAGAAAGCTGGGT<br>GAAGCAACACTCAAATCTAGATGTTTTA |
| pSSN1            | GGGGACAAGTTTGTACAAAAAAGCAG<br>GCTCGTTCAATTAATTTTTTAAAGGGT<br>CTTGT | GGGGACCACTTTGTACAAGAAAGCTGGGT<br>CCACTGCTGTGTTAAGAAAGTGTAGAG  |
| pSSN2            | GGGGACAAGTTTGTACAAAAAAGCAG<br>GCTCGACTCAATCACAGTCCCTGGTAT<br>G     | GGGGACCACTTTGTACAAGAAAGCTGGGT<br>CCTCTGCTTATTTTGATGGGAAAGT    |
| SSN1-GFP         | GGGGACAAGTTTGTACAAAAAAGCAG<br>GCTTCATGGATCTTCTTGATTTCTCCAC<br>T    | GGGGACCACTTTGTACAAGAAAGCTGGGT<br>TGTTATAGAGCTCAGGAGCAAGGC     |
| PR1-RL           | GACTCTGICCATCTTGGTTGTGCTA                                          | TTTAGTAAGGTTTTTGACCGACGAA                                     |
| PR2-RL           | CCACCAGCAGCAGAAGTTATCG                                             | TTCAAGGTTTGCCTCGGAAGA                                         |
| PR3-RL           | ACTCCACAATCACCGAAGCCAT                                             | GCATTCCAACCTTACCACATTC                                        |
| PR5-RL           | GCCGTGATTCATACAGTTATCCTCA                                          | TTGGCTCTTACTTCCGACCATCT                                       |
| PR10-RL          | TTTTACTGTTGGCGACTATGTGA                                            | TTAGTTGCAGGCATCAGGGTTAG                                       |
| NPR1-RL          | GCGAATCGTTGCTTTCTTCTTCA                                            | CACGTGGTGCTGTTGTTGTTACTG                                      |
| ICS1-RL          | ATGGATGAATGGGTGCGAAGG                                              | AAGAATGCCAGAGGTAAGAGGAGGA                                     |

|                  |                             |                                 |
|------------------|-----------------------------|---------------------------------|
| EDS1-RL          | GCAGCAACAGCTCCTCTACCTCAA    | GGCAGACCAAGACGCTACAGATACA       |
| PAD4-RL          | GGATGGAAGAATGGAAAGAAATGAA   | GAACTAGGAAAGCAGACTAAGGAACCA     |
| CAT-RL           | TGTTCCCTATCCCACCTGCTGT      | GAATCGCTCTTGCCGTGCTGC           |
| PR1-RT           | CTTGTGCACTCCAGTGGACCTTAT    | CCATTTCAGTAGGCAAATCAGTACATA     |
| PR5-RT           | CCTCCTCTTCTTTAGCGTCTTTTC    | GAGCTCTTAACTCATTTCGGGCATT       |
| LOX1-RL          | TAGAGAGGACATTTTGCCCTGG      | GGTCAAGGTCGTCCAGAGATTTTA        |
| LOX2-RL          | TTTTACTCCTACTGTGCTTCCCTTCA  | CCATGCCAACTCCGATTTTTTCTC        |
| LOX5-RL          | CAATACGCTTACGGAGGCTACTTC    | AGACCTTCTCAGGGTCTTTTCAA         |
| GhLOX1           | GATGGACTGGAGATTTGGTTTGC     | GGAGTTCTTTCCACCAGGCTTGA         |
| AOS-RL           | CGATGTCCCAACTTCAATCTCAAAC   | ATCCGACGGTGGAGAATAAACAGT        |
| AOC4-RL          | AATAGAGCATAAACCCGAAATGAAAG  | CAAAAATGCCAGACCCACCAGTA         |
| JAZ1-RL          | GACCAAATCTTGTGGCATCTACCTC   | CTTTGGTTCCACTGCTGCTGATT         |
| JAZ3-RL          | GCGGGTGAAGTGAATGTCTTTGAT    | GAAGTGGTTTCAAATAGGAGTCTGGA      |
| JAZ10-RL         | TGAATAATTAAGGACGGGGTGTTCC   | ATCAGACCGTCGAGACAAGCATTAA       |
| AOS-RT           | GACAAAGCCCTTGCAATTGACGA     | CCGTTGATGAAATCGGTGGTGT          |
| JAZ1-RT          | AGTTTTCAAACATCAGAAGGGAGGA   | TCCGCGGGAAAATCATTATATACA        |
| JAZ3-RT          | GCCAAGCCCTTTACCTGTTTCATC    | AAACCAAATGCCAAACATAAACCT        |
| SAD-RL           | ATCAGATGGATTTACGAGCAAGT     | AAGGAGTAAGGCTAGCACCTGTTTC       |
| FAD2-RL          | CACTGTTTCCAACGCTCACTTATC    | AAGATAGTGGCTGAGGGAGGTTG         |
| FAD3-RL          | GCTCTACGGTGTCCCTACTTGATT    | CGGTCTATTGTTGTAAGCCCTCCT        |
| FAD6-RL          | ACAGGCACCATGCAAAGACAAAC     | GCTATGGACATCCAAGGTCGAAA         |
| FAD7-RL          | ACCCAAGCCAACAAGAATAGCAG     | GTGGAACAGAAGTCCAGGAAAGAGT       |
| FAD8-RL          | ATGGAGAATTAGCCACAGGACTCA    | AACCGCAATGTTCTGTGTTAGAGTAT      |
| $\alpha$ -DOX1-R | CACTTTGGGAGGTTTAGTTGGTCT    | TGTATGGAATCTGGTAAAAGTTGGTG      |
| L                |                             |                                 |
| $\alpha$ -DOX2-R | TCATTTGGAGGACTCAACAGGTA     | GTGTCCTTGTATTGAGAAAGCCAAA       |
| L                |                             |                                 |
| HPL-RL           | CATTGAGCAGCACGGTAAAGAAG     | CCGAAGGCATTAACCCAAGAGT          |
|                  |                             |                                 |
| AZI1-RL          | AAACCCTACTCCCTCCCCATCT      | AGACCTTGGATGAGAGAGCAGCA         |
|                  |                             |                                 |
| AZI1-RT          | AAACCCTACTCCCTCCCCATCT      | CGACATTGGAAGCCAGAGGGTA          |
| V-LOX1           | CGGGGTACCATGCAGACTCGAGAAGA  | CGCGGATCCCGTTGTTTCATCTCTACAATCC |
|                  | GTTGATCG                    | GTTCC                           |
| V-LOX2           | CGGGGTACCCCGAAGAGGCAACTGAA  | CGCGGATCCGCTCAGATGGAGATGCTATA   |
|                  | AGAGAT                      | TGGAA                           |
| UBQ7             | GAAGGCATTCCACCTGACCAAC      | CTTGACCTTCTTCTTCTTGTGCTTG       |
| 35S              | AAGTTCATTTCAATTTGGAGAGGACAC |                                 |
| NPT II           | CGGCGATACCGTAAAGCACGAGGAA   | CGACGTTGTCACTGAAGCGGGAAGG       |
